# Supplementary material
Source: publisher figshare collection journal article supplement (https://acs.figshare.com/ndownloader/files/4510963)
Supplement: Supplementary file 1 [file 4510963]

# Microwave–Assisted Ullmann C–S Bond Formation: Synthesis of the P38 $\alpha$ MAPK Clinical Candidate VX–745

Mark C. Bagley,<sup>\*a</sup> Terence Davis,<sup>b</sup> Matthew C. Dix,<sup>a</sup> Vincenzo Fusillo,<sup>a</sup> Morgane Pigeaux,<sup>a</sup> Michal J. Rokicki,<sup>b</sup> and David Kipling<sup>b</sup>

<sup>a</sup>*School of Chemistry, Main Building, Cardiff University, Park Place, Cardiff, CF10 3AT, UK; Email Address Bagleymc@cf.ac.uk*

<sup>b</sup>*Department of Pathology, School of Medicine, Cardiff University, Heath Park, Cardiff, CF14 4XN, UK*

## CONTENTS.

S1 General Procedures

S3 Experimental Procedures for Table 1

S7 Experimental Procedures for Table 2

S9 Experimental Procedures for Table 3

S11 <sup>1</sup>H NMR for phenyl sulfide (**4a**)

S12 <sup>13</sup>C NMR for phenyl sulfide (**4a**)

S13 <sup>1</sup>H NMR for 4-nitrophenyl phenyl sulfide (**4b**)

S14 <sup>13</sup>C NMR for 4-nitrophenyl phenyl sulfide (**4b**)

S15 <sup>1</sup>H NMR for 4-(phenylthio)anisole (**4c**)

S16 <sup>13</sup>C NMR for 4-(phenylthio)anisole (**4c**)

S17 <sup>1</sup>H NMR for phenyl disulfide (**5**)

S18 <sup>13</sup>C NMR for phenyl disulfide (**5**)

S19 <sup>1</sup>H NMR for 2-(phenylthio)pyridine (**7a**)

S20 <sup>13</sup>C NMR for 2-(phenylthio)pyridine (**7a**)

S21  $^1\text{H}$  NMR for 3,6-bis(phenylthio)pyridazine (**7c**)

S22  $^{13}\text{C}$  NMR for 3,6-bis(phenylthio)pyridazine (**7c**)

S23  $^1\text{H}$  NMR for acetonitrile **9**

S24  $^{13}\text{C}$  NMR for acetonitrile **9**

S25  $^1\text{H}$  NMR for sulfide **10**

S26  $^{13}\text{C}$  NMR for sulfide **10**

S27  $^1\text{H}$  NMR for VX-745 (**1**)

S28  $^{13}\text{C}$  NMR for VX-745 (**1**)

S29 Additional references

**General Procedures.** Commercially available reagents were used without further purification; solvents were dried by standard procedures. Light petroleum refers to the fraction with bp 40-60 °C and ether refers to diethyl ether. Flash chromatography was carried out using Merck Kieselgel 60 H silica or Matrex silica 60. Analytical thin layer chromatography was carried out using aluminium-backed plates coated with Merck Kieselgel 60 GF<sub>254</sub> that were visualised under UV light (at 254 and/or 360 nm). Microwave irradiation experiments were performed using a self-tunable CEM Discover focused monomodal microwave synthesiser at the given temperature, measured using the instrument's in-built IR sensor, by varying the irradiation power (initial power given in parentheses). Infra-red (IR) spectra were recorded in the range 4000-600  $\text{cm}^{-1}$  using KBr disks for solid samples and thin films between NaCl plates for liquid samples or as a nujol mull and are reported in  $\text{cm}^{-1}$ . Nuclear magnetic resonance (NMR) spectra were recorded in  $\text{CDCl}_3$  at 25 °C unless stated otherwise and were reported in ppm;  $J$  values were recorded in Hz and multiplicities were expressed by the usual conventions. Low-resolution mass spectra (MS) were determined using atmospheric pressure chemical ionization (APCI) unless otherwise stated. ES refers to electrospray ionization, CI refers to chemical ionization (ammonia) and EI refers to electron ionization. *In vacuo* refers to evaporation at reduced pressure using a rotary evaporator and diaphragm pump, followed by the removal of trace volatiles using a vacuum (oil) pump.

## Experimental Procedures for Table 1

**4-Nitrophenyl phenyl sulfide (4b) (Table 1 entry 2).** A solution of 4-nitroiodobenzene (**3b**) (249 mg, 1.0 mmol), PhSH (107 mg, 0.1 mL, 1.0 mmol), Pd(OAc)<sub>2</sub> (5.6 mg, 0.025 mmol), Xantphos<sup>TM</sup> (29 mg, 0.05 mmol), LiCl (5.6 mg, 0.025 mmol) and *i*Pr<sub>2</sub>NEt (258 mg, 2 mmol) in dry dioxane (2 mL) was irradiated at 100 °C for 3 x 30 min in a pressure-rated glass tube (10 mL) using a CEM Discover microwave synthesiser by moderating the initial power (150 W). The reaction mixture was cooled to rt, partitioned between water and Et<sub>2</sub>O and the aqueous layer further extracted with Et<sub>2</sub>O. The combined organic extracts were washed with brine, dried (MgSO<sub>4</sub>) and evaporated in vacuo. Purification by column chromatography on SiO<sub>2</sub>, eluting with light petroleum–CH<sub>2</sub>Cl<sub>2</sub> (3:1), gave **4b** (24 mg, 11%) as a yellow solid, mp 52 °C (lit.<sup>1</sup> mp 50–55 °C) (found: M<sup>+</sup>, 231.0347. C<sub>12</sub>H<sub>9</sub>NO<sub>2</sub>S [M] requires 231.0354); <sup>1</sup>H NMR (400 MHz; *d*<sub>6</sub>–DMSO) δ 8.15, 7.29 (4H, AA'XX', *J*<sub>AX</sub> 9), 7.62–7.58 (2H, m), 7.55 (3H); <sup>13</sup>C NMR (100 MHz, *d*<sub>6</sub>–DMSO) 148.6 (C), 145.3 (C), 134.8 (C), 130.4 (CH), 130.1 (CH), 129.7 (CH), 126.6 (CH), 124.1 (CH); MS (EI) *m/z* (rel. intensity) 231 (M<sup>+</sup>, 100), 201 (33), 184 (79), 152 (14).

**4-Nitrophenyl phenyl sulfide (4b) (Table 1 entry 3).** A solution of 4-nitroiodobenzene (**3b**) (284 mg, 1.1 mmol), PhSH (275 mg, 2.5 mmol), Pd(PPh<sub>3</sub>)<sub>4</sub> (66 mg, 0.057 mmol) and NaOtBu (438 mg, 4.6 mmol) in IPA (3 mL) was irradiated at 100 °C for 1 h in a pressure-rated glass tube (10 mL) using a CEM Discover microwave synthesiser by moderating the initial power (150 W). The reaction mixture was cooled to rt and evaporated *in vacuo*. The residue was partitioned between water and hexane and the organic layer was washed successively with water and brine, dried and evaporated in vacuo to give **4b** (30 mg, 12%) as a yellow solid.

**Phenyl disulfide (5) (Table 1 entries 4 and 5).** A solution of bromobenzene (**3a**) (157 mg, 1.0 mmol), PhSH (132 mg, 1.2 mmol) and CsOH (336 mg, 2.0 mmol) in DMSO (3 mL) was irradiated at 120 °C for 5–10 min in a pressure-rated glass tube (10 mL) using a CEM Discover microwave synthesiser by moderating the initial power (200–250 W). The reaction mixture was cooled to rt and partitioned between saturated aqueous NH<sub>4</sub>Cl and Et<sub>2</sub>O. The aqueous layer was further extracted with Et<sub>2</sub>O and the combined ethereal extracts were washed successively with saturated aqueous NH<sub>4</sub>Cl and brine, dried (MgSO<sub>4</sub>) and evaporated in vacuo to give the *title compound* as a yellow solid, mp 61 °C (lit.<sup>2</sup> mp 61–63 °C); <sup>1</sup>H NMR (400 MHz; *d*<sub>6</sub>–DMSO) δ 7.53 (4H, d, *J* 8), 7.38 (4H, app t, *J* 8), 7.30 (2H, t, *J* 8); <sup>13</sup>C NMR (100 MHz; *d*<sub>6</sub>–DMSO) 136.2 (C), 129.9 (CH), 128 (CH), 127.6 (CH); MS (EI) *m/z* (rel. intensity) 218 (M<sup>+</sup>, 95%), 185 (15), 154 (20), 109 (100).

**Phenyl sulfide (4a) (Table 1 entry 6).** A solution of bromobenzene (**3a**) (157 mg, 1.0 mmol), PhSH (132 mg, 1.2 mmol) and CsOH (336 mg, 2.0 mmol) in dry DMSO (3 mL) was irradiated at 100 °C for 10 min in a pressure-rated glass tube (10 mL) using a CEM Discover microwave synthesiser by moderating the initial power (200 W). The reaction mixture was cooled to rt and partitioned between saturated aqueous NH<sub>4</sub>Cl and Et<sub>2</sub>O. The aqueous layer was further extracted with Et<sub>2</sub>O and the combined ethereal extracts were washed successively with saturated aqueous NH<sub>4</sub>Cl and brine, dried (MgSO<sub>4</sub>) and evaporated in vacuo to give the *title compound* (28 mg, 15%) as a yellow oil (found: M<sup>+</sup>, 186.0510. C<sub>12</sub>H<sub>11</sub>S [*M*] requires 186.0503); <sup>1</sup>H NMR (400 MHz, *d*<sub>6</sub>-DMSO) δ 7.53 (4H, d, *J* 8), 7.38 (4H, app t, *J* 8), 7.30 (2H, t, *J* 8); <sup>13</sup>C NMR (100 MHz, *d*<sub>6</sub>-DMSO) 136.2 (C), 130 (CH), 128.1 (CH), 127.6 (CH); MS (EI) *m/z* (rel. intensity) 186 (M<sup>+</sup>, 100), 171 (10).

**4-Nitrophenyl phenyl sulfide (4b) (Table 1 entry 7).** A solution of 4-nitroiodobenzene (249 mg, 1.0 mmol), PhSH (0.12 mL, 1.2 mmol) and CsOH (336 mg, 2.0 mmol) in dry DMSO (3 mL) was irradiated at 120 °C for 10 min in a pressure-rated glass tube (10 mL) using a CEM Discover microwave synthesiser by moderating the initial power (150 W). After cooling the reaction mixture in a flow of compressed air, it was filtered and evaporated in vacuo. Purification by column chromatography on SiO<sub>2</sub>, eluting with light petroleum–CH<sub>2</sub>Cl<sub>2</sub> (3:1), gave the *title compound* (25 mg, 11%) as a yellow solid, mp 50 °C (lit.<sup>1</sup> mp 50–55 °C), with identical physical and spectroscopic properties.

**4-Nitrophenyl phenyl sulfide (4b) (Table 1 entry 10).** According to the typical experimental procedure (see main text), a solution of 4-nitroiodobenzene (162 mg, 0.65 mmol), PhSH (0.05 mL, 0.50 mmol), PEPPSI-*i*Pr (7 mg, 0.01 mmol), LiCl (4.5 mg, 0.1 mmol) and NaO*t*Bu (72 mg, 0.75 mmol) in dry PhMe (2 mL) was irradiated at 120 °C for 3 x 1 h in a pressure-rated glass tube (10 mL) using a CEM Discover microwave synthesiser by moderating the initial power (150 W). After cooling in a flow of compressed air, the reaction mixture was filtered and evaporated in vacuo. Purification by column chromatography on SiO<sub>2</sub>, eluting with light petroleum–CH<sub>2</sub>Cl<sub>2</sub> (3:1), gave the *title compound* (86 mg, 74%) as a yellow solid, mp 53 °C (lit.<sup>1</sup> mp 50–55 °C), with identical physical and spectroscopic properties.

**4-Nitrophenyl phenyl sulfide (4b) (Table 1 entry 11).** A solution of 4-nitroiodobenzene (162 mg, 0.65 mmol), PhSH (0.05 mL, 0.50 mmol), PEPPSI-*i*Pr (7 mg, 0.01 mmol), LiCl (4.5 mg, 0.1 mmol) and K<sub>2</sub>CO<sub>3</sub> (138 mg, 1 mmol) in dry dioxane (2 mL) was irradiated at 120 °C for 3 x 1 h in a pressure-rated glass tube (10 mL) using a CEM Discover microwave synthesiser by moderating the initial power (150 W). After cooling in a flow of compressed air, the reaction mixture was partitioned between H<sub>2</sub>O and Et<sub>2</sub>O and the aqueous layer further extracted

with Et<sub>2</sub>O. The combined ethereal extracts were washed with brine, dried (MgSO<sub>4</sub>) and evaporated *in vacuo*. Purification by column chromatography on SiO<sub>2</sub>, eluting with light petroleum–CH<sub>2</sub>Cl<sub>2</sub> (3:1), gave the *title compound* (51 mg, 44%) as a yellow solid, mp 52 °C (lit.<sup>1</sup> mp 50–55 °C), with identical physical and spectroscopic properties.

**4-Nitrophenyl phenyl sulfide (4b) (Table 1 entry 12).** A solution of 4-nitroiodobenzene (162 mg, 0.65 mmol), PhSH (0.05 mL, 0.50 mmol), PEPPSI-*i*Pr (7 mg, 0.01 mmol), LiCl (4.5 mg, 0.1 mmol) and NaOtBu (72 mg, 0.75 mmol) in dry dioxane (2 mL) was irradiated at 120 °C for 3 x 1 h in a pressure-rated glass tube (10 mL) using a CEM Discover microwave synthesiser by moderating the initial power (150 W). After cooling in a flow of compressed air, the reaction mixture was partitioned between H<sub>2</sub>O and Et<sub>2</sub>O and the aqueous layer further extracted with Et<sub>2</sub>O. The combined ethereal extracts were washed with brine, dried (MgSO<sub>4</sub>) and evaporated *in vacuo*. Purification by column chromatography on SiO<sub>2</sub>, eluting with light petroleum–CH<sub>2</sub>Cl<sub>2</sub> (3:1), gave the *title compound* (52 mg, 45%) as a yellow solid, mp 52 °C (lit.<sup>1</sup> mp 50–55 °C), with identical physical and spectroscopic properties.

**4-Nitrophenyl phenyl sulfide (4b) (Table 1 entry 15).** A solution of 4-nitroiodobenzene (249 mg, 1.0 mmol), PhSH (0.10 mL, 1.0 mmol) and NaOtBu (144 mg, 1.5 mmol) in dry PhMe (2 mL) was irradiated at 120 °C for 90 min, then 2 x 1 h, in a pressure-rated glass tube (10 mL) using a CEM Discover microwave synthesiser by moderating the initial power (150 W). After cooling in a flow of compressed air, the reaction mixture was filtered and evaporated *in vacuo*. Purification by column chromatography on SiO<sub>2</sub>, eluting with light petroleum–CH<sub>2</sub>Cl<sub>2</sub> (3:1), gave the *title compound* (108 mg, 47%) as a yellow solid, mp 54 °C (lit.<sup>1</sup> mp 50–55 °C), with identical physical and spectroscopic properties.

**4-Nitrophenyl phenyl sulfide (4b) (Table 1 entry 16).** According to the typical experimental procedure (see main text), a solution of 4-nitroiodobenzene (162 mg, 0.65 mmol), PhSH (0.05 mL, 0.50 mmol), LiCl (4.5 mg, 0.1 mmol) and NaOtBu (72 mg, 0.75 mmol) in dry PhMe (2 mL) was irradiated at 120 °C for 3 x 1 h in a pressure-rated glass tube (10 mL) using a CEM Discover microwave synthesiser by moderating the initial power (150 W). After cooling in a flow of compressed air, the reaction mixture was partitioned between H<sub>2</sub>O and Et<sub>2</sub>O and the aqueous layer further extracted with Et<sub>2</sub>O. The combined ethereal extracts were washed with brine, dried (MgSO<sub>4</sub>) and evaporated *in*

*vacuo*. Purification by column chromatography on SiO<sub>2</sub>, eluting with light petroleum–CH<sub>2</sub>Cl<sub>2</sub> (3:1), gave the *title compound* (93 mg, 80%) as a yellow solid, mp 52 °C (lit.<sup>1</sup> mp 50–55 °C), with identical physical and spectroscopic properties.

**4-Nitrophenyl phenyl sulfide (4b) (Table 1 entry 17).** A solution of 4-nitroiodobenzene (249 mg, 1.0 mmol), PhSH (0.11 mL, 1.1 mmol), CuI (19 mg, 0.10 mmol), neocuproine (20 mg, 0.10 mmol) and NaOtBu (144 mg, 1.5 mmol) in dry PhMe (3 mL) was irradiated at 80 °C in a pressure-rated glass tube (10 mL) for 3 x 1 h by moderating the initial power (150 W). After cooling in a flow of compressed air, the reaction mixture was filtered and evaporated *in vacuo*. Purification by column chromatography on SiO<sub>2</sub>, eluting with light petroleum–CH<sub>2</sub>Cl<sub>2</sub> (3:1), gave the *title compound* (142 mg, 61%) as a yellow solid, mp 48 °C (lit.<sup>1</sup> mp 50–55 °C), with identical physical and spectroscopic properties.

**4-(Phenylthio)anisole (4c) (Table 1 entry 23).** A solution of 4-iodoanisole (234 mg, 1.0 mmol), PhSH (0.11 mL, 1.1 mmol), CuI (19 mg, 0.10 mmol), neocuproine (20 mg, 0.10 mmol) and NaOtBu (144 mg, 1.5 mmol) in dry PhMe (3 mL) was irradiated at 80 °C for 2 x 1 h in a pressure-rated glass tube (10 mL) using a CEM Discover microwave synthesiser by moderating the initial power (150 W). After cooling in a flow of compressed air, the reaction mixture was filtered and evaporated *in vacuo*. Purification by column chromatography on SiO<sub>2</sub>, eluting with light petroleum–EtOAc (3:1), gave the *title compound* (89 mg, 41%) as a yellow oil (found: M<sup>+</sup>, 216.0614. C<sub>13</sub>H<sub>12</sub>OS [*M*] requires 216.0609); <sup>1</sup>H NMR (400 MHz, *d*<sub>6</sub>-DMSO) δ 7.42, 7.01 (4H, AA'XX', *J*<sub>AX</sub> 9), 7.30 (2H, m), 7.19 (1H, app tt, *J* 7, 1), 7.05 (2H, m), 3.78 (3H, s); <sup>13</sup>C NMR (125 MHz; *d*<sub>6</sub>-DMSO) 158.8 (C), 137.6 (C), 134.3 (CH), 127.9 (CH), 127.3 (CH), 124.7 (C), 123.4 (CH), 114 (CH), 54.4 (Me); MS (EI) *m/z* (rel. intensity) 216 (M<sup>+</sup>, 100%), 201 (55).

**4-(Phenylthio)anisole (4c) (Table 1 entry 29).** According to the typical experimental procedure (see main text), a solution of 4-iodoanisole (117 mg, 0.5 mmol), PhSH (55 mg, 0.05 mL, 0.5 mmol), CuI (5 mg, 25 μmol), (±)-*trans*-cyclohexane-1,2-diol (116 mg, 1.0 mmol), K<sub>2</sub>CO<sub>3</sub> (138 mg, 1.0 mmol) in 2-propanol (2 mL) was irradiated at 120 °C for 3 x 1 h in a pressure-rated glass tube (10 mL) using a CEM Discover microwave synthesiser by moderating the initial power (150 W). After cooling in a flow of compressed air, the reaction mixture was filtered and evaporated *in vacuo*. Purification by column chromatography on silica gel, eluting with hexane–CH<sub>2</sub>Cl<sub>2</sub> (3:1), gave the *title compound* (103 mg, 95%) as a yellow oil (found: M<sup>+</sup>, 216.0607. C<sub>13</sub>H<sub>12</sub>OS [*M*] requires 216.0609), with identical spectroscopic properties.

## Experimental Procedures for Table 2

**2-(Phenylthio)pyridine (7a) (Table 2 entry 1).** According to the typical experimental procedure (see main text), a solution of 2-iodopyridine (192 mg, 1.0 mmol), PhSH (118 mg, 1.1 mmol), neocuproine (21 mg, 0.10 mmol) and NaOtBu (144 mg, 1.5 mmol) in dry PhMe (2 mL) was irradiated at 120 °C for 3 x 1 h in a pressure-rated glass tube (10 mL) using a CEM Discover microwave synthesiser by moderating the initial power (150 W). After cooling in a flow of compressed air, the reaction mixture was filtered and evaporated in vacuo. Purification by column chromatography on SiO<sub>2</sub>, eluting with light petroleum–CH<sub>2</sub>Cl<sub>2</sub> (1:1), gave the *title compound* (142 mg, 76%) as a pale yellow oil (found: M<sup>+</sup>, 187.0454. C<sub>11</sub>H<sub>9</sub>NS [*M*] requires 187.0456); <sup>1</sup>H NMR (400 MHz, *d*<sub>6</sub>–DMSO) δ 8.40 (1H, ddd, *J* 4.8, 2, 1), 7.65 (1H, ddd, *J* 8, 7.5, 2), 7.59 (2H, m), 7.51–7.48 (3H), 7.15 (1H, ddd, *J* 7.5, 4.8, 1), 6.94 (1H, app dt, *J* 8, 1); <sup>13</sup>C NMR (100 MHz; *d*<sub>6</sub>–DMSO) 159.8 (C), 149.6 (CH), 137.4 (CH), 134.6 (C), 130.2 (CH), 129.8 (CH), 129.2 (CH), 121.1 (CH), 120.5 (CH); MS (EI) *m/z* (rel. intensity) 187 (M<sup>+</sup>, 25%).

**2-(Phenylthio)pyridine (7a) (Table 2 entry 2).** A solution of 2-iodopyridine (192 mg, 1.0 mmol), PhSH (107 mg, 0.10 mL, 1.0 mmol), PEPPSI-*i*Pr (13 mg, 0.02 mmol) and NaOtBu (144 mg, 1.5 mmol) in dry PhMe (2 mL) was irradiated at 120 °C for 3 x 1 h in a pressure-rated glass tube (10 mL) using a CEM Discover microwave synthesiser by moderating the initial power (150 W). After cooling in a flow of compressed air, the reaction mixture was filtered and evaporated in vacuo. Purification by column chromatography on SiO<sub>2</sub>, eluting with light petroleum–CH<sub>2</sub>Cl<sub>2</sub> (1:1), gave the *title compound* (119 mg, 64%) as a pale yellow oil, with identical physical and spectroscopic properties.

**2-(Phenylthio)pyridine (7a) (Table 2 entry 3).** According to the typical experimental procedure (see main text), a solution of 2-iodopyridine (192 mg, 1.0 mmol), PhSH (107 mg, 0.10 mL, 1.0 mmol), PEPPSI-*i*Pr (13 mg, 0.02 mmol), LiCl (9 mg, 20 mol%) and NaOtBu (144 mg, 1.5 mmol) in dry PhMe (2 mL) was irradiated at 120 °C for 3 x 1 h in a pressure-rated glass tube (10 mL) using a CEM Discover microwave synthesiser by moderating the initial power (150 W). After cooling in a flow of compressed air, the reaction mixture was filtered and evaporated in vacuo. Purification by column chromatography on SiO<sub>2</sub>, eluting with light petroleum–CH<sub>2</sub>Cl<sub>2</sub> (1:1), gave the *title compound* (165 mg, 88%) as a pale yellow oil, with identical physical and spectroscopic properties.

**2-(Phenylthio)pyridine (7a) (Table 2 entry 5).** According to the typical experimental procedure (see main text), a solution of 2-iodopyridine (192 mg, 1.0 mmol), PhSH (107 mg, 0.10 mL, 1.0 mmol), CuI (19 mg, 0.10 mmol), neocuproine (20 mg, 0.10 mmol) and NaOtBu (144 mg, 1.5 mmol) in dry PhMe (2 mL) was irradiated at 120 °C for 3 x 1 h in a pressure-rated glass tube (10 mL) using a CEM Discover microwave synthesiser by moderating the initial power (150 W). After cooling in a flow of compressed air, the reaction mixture was filtered and evaporated in vacuo. Purification by column chromatography on SiO<sub>2</sub>, eluting with light petroleum–CH<sub>2</sub>Cl<sub>2</sub> (1:1), gave the *title compound* (180 mg, 96%) as a pale yellow oil, with identical physical and spectroscopic properties.

**2-(Phenylthio)pyridine (7a) (Table 2 entry 6).** According to the typical experimental procedure (see main text), a solution of 2-iodopyridine (96 mg, 0.5 mmol), PhSH (55 mg, 0.05 mL, 0.5 mmol), CuI (5 mg, 25 µmol), (±)-*trans*-cyclohexane-1,2-diol (0.12 g, 1.0 mmol) and K<sub>2</sub>CO<sub>3</sub> (0.14 g, 1.0 mmol) in 2-propanol (2 mL) was irradiated at 120 °C for 3 x 1 h in a pressure-rated glass tube (10 mL) using a CEM Discover microwave synthesiser by moderating the initial power (150 W). After cooling in a flow of compressed air, the reaction mixture was filtered and evaporated *in vacuo*. Purification by column chromatography on SiO<sub>2</sub>, eluting with light petroleum–CH<sub>2</sub>Cl<sub>2</sub> (1:1), gave the *title compound* (85 mg, 91%) as a pale yellow oil, with identical physical and spectroscopic properties.

**3,6-Bis(phenylthio)pyridazine (7c) (Table 2 entry 7).** According to the typical experimental procedure (see main text), a solution of 3,6-dichloropyridazine (**2**) (149 mg, 1.0 mmol), PhSH (107 mg, 0.10 mL, 1.0 mmol), PEPPSI-*i*Pr (13 mg, 0.02 mmol), LiCl (9 mg, 20 mol%) and NaOtBu (144 mg, 1.5 mmol) in dry PhMe (2 mL) was irradiated at 120 °C for 3 x 1 h in a pressure-rated glass tube (10 mL) using a CEM Discover microwave synthesiser by moderating the initial power (150 W). After cooling in a flow of compressed air, the reaction mixture was filtered and evaporated in vacuo. Purification by column chromatography on SiO<sub>2</sub>, eluting with light petroleum–CH<sub>2</sub>Cl<sub>2</sub> (1:1), gave the *title compound*<sup>3</sup> (124 mg, 42%) as a brown oil (found: M<sup>+</sup>, 296.0453. C<sub>16</sub>H<sub>12</sub>N<sub>2</sub>S<sub>2</sub> [*M*] requires 296.0442) which was not purified further; <sup>1</sup>H NMR (400 MHz, *d*<sub>6</sub>-DMSO) δ 7.61–7.58 (4H, m), 7.51–7.48 (6H), 7.19 (2H, s); <sup>13</sup>C NMR (125 MHz; *d*<sub>6</sub>-DMSO) 161.3 (C), 134.5 (C), 129.9 (CH), 129.6 (CH), 128.7 (CH), 126.4 (CH); MS (EI) *m/z* (rel. intensity) 296 (M<sup>+</sup>, 30%), 109 (22).

**3,6-Bis(phenylthio)pyridazine (7c) (Table 2 entry 8).** According to the typical experimental procedure (see main text), a solution of 3,6-dichloropyridazine (**2**) (149 mg, 1.0 mmol), PhSH (107 mg, 0.10 mL, 1.0 mmol), CuI (19 mg, 0.10 mmol), neocuproine (20 mg, 0.10 mmol)



and NaOtBu (144 mg, 1.5 mmol) in dry PhMe (2 mL) was irradiated at 120 °C for 3 x 1 h in a pressure-rated glass tube (10 mL) using a CEM Discover microwave synthesiser by moderating the initial power (150 W). After cooling in a flow of compressed air, the reaction mixture was filtered and evaporated in vacuo. Purification by column chromatography on SiO<sub>2</sub>, eluting with light petroleum–CH<sub>2</sub>Cl<sub>2</sub> (1:1), gave the *title compound* (190 mg, 75%) as a brown oil, with identical physical and spectroscopic properties.

**3,6-Bis(phenylthio)pyridazine (7c) (Table 2 entry 9).** A solution of 3,6-dichloropyridazine (**2**) (149 mg, 1.0 mmol), PhSH (107 mg, 0.10 mL, 1.0 mmol) and NaOtBu (144 mg, 1.5 mmol) in dry PhMe (2 mL) was irradiated at 120 °C for 3 x 1 h in a pressure-rated glass tube (10 mL) using a CEM Discover microwave synthesiser by moderating the initial power (150 W). After cooling in a flow of compressed air, the reaction mixture was filtered and evaporated in vacuo. Purification by column chromatography on SiO<sub>2</sub>, eluting with light petroleum–CH<sub>2</sub>Cl<sub>2</sub> (1:1), gave the *title compound* (140 mg, 47%) as a brown oil, with identical physical and spectroscopic properties.

### Experimental Procedures for Table 3

**6-Chloro- $\alpha$ -(2,6-dichlorophenyl)-3-pyridazineacetonitrile (9).** In a repeat of the literature procedure,<sup>19a</sup> a solution of (2,6-dichlorophenyl)acetonitrile (**8**) (2.0 g, 10.8 mmol) in anhydrous THF (20 mL) was added to a suspension of NaH (0.50 g, 12.9 mmol) in THF (20 mL) at room temperature. After 15 min, a solution of 3,6-dichloropyridazine (**2**) (1.6 g, 10.8 mmol) in dry THF (10 mL) was added dropwise and the solution was stirred for a further 30 min. The mixture was partitioned between saturated aqueous NH<sub>4</sub>Cl solution (20 mL) and EtOAc (20 mL). The aqueous layer was further extracted with EtOAc (2 x 20 mL) and the combined organic extracts were washed with brine (20 mL), dried (Na<sub>2</sub>SO<sub>4</sub>) and evaporated *in vacuo* to give a red oil. Purification by column chromatography on SiO<sub>2</sub>, eluting with EtOAc–hexane (1:1), and recrystallization (EtOH) gave the *title compound* (1.0 g, 32%) as orange needles, mp 122–124 °C (lit.<sup>19a</sup> mp 124–131 °C) with identical spectroscopic properties.

**$\alpha$ -(2,6-Dichlorophenyl)-6-[(2,4-difluorophenyl)thio]-3-pyridazineacetonitrile (10) (Table 3, entry 11).** 6-Chloro- $\alpha$ -(2,6-dichlorophenyl)-3-pyridazineacetonitrile (**9**) (120 mg, 0.4 mmol) was added to a stirred solution of CuI (8 mg, 40  $\mu$ mol) in dioxane (5 mL) at room temperature. A solution of NEt<sub>3</sub> (67  $\mu$ L, 0.5 mmol) and 2,4-difluorothiophenol (46  $\mu$ L, 0.4 mmol) in dioxane (5 mL) was added by

syringe and the solution heated to 90 °C in an oil bath for 16 h. After this time the reaction mixture was allowed to cool and evaporated *in vacuo*. The residue was partitioned between H<sub>2</sub>O (10 mL) and EtOAc (10 mL) and the aqueous layer was further extracted with EtOAc (2 × 10 mL). The combined organic extracts were washed successively with aqueous NaOH (1M, 10 mL) and brine (10 mL), dried (Na<sub>2</sub>SO<sub>4</sub>) and evaporated *in vacuo* to give an orange solid. Purification by column chromatography on SiO<sub>2</sub>, eluting with EtOAc–hexane (1:1), gave the *title compound* (133 mg, 82%) as an orange solid, mp 134–136 °C (Found: MH<sup>+</sup>, 407.9940. C<sub>18</sub>H<sub>10</sub><sup>35</sup>Cl<sub>2</sub>F<sub>2</sub>N<sub>3</sub>S [MH] requires 407.9941), with identical spectroscopic properties.

**α-(2,6-Dichlorophenyl)-6-[(2,4-difluorophenyl)thio]-3-pyridazineacetonitrile (10) (Table 3, entry 12).** 6-Chloro-α-(2,6-dichlorophenyl)-3-pyridazineacetonitrile (**9**) (120 mg, 0.4 mmol) was added to a solution of CuI (8 mg, 40 μmol), NEt<sub>3</sub> (67 μL, 0.5 mmol) and 2,4-difluorothiophenol (46 μL, 0.4 mmol) in dioxane (2 mL). The solution was irradiated at 120 °C for 3 x 1 h in a pressure-rated glass tube (10 mL) using a CEM Discover microwave synthesiser by moderating the initial power (100 W). After cooling in a flow of compressed air, the reaction mixture was filtered and evaporated *in vacuo*. Purification by column chromatography on SiO<sub>2</sub>, eluting with EtOAc–hexane (1:1), gave the *title compound* (90 mg, 55%) as an orange solid with identical physical and spectroscopic properties.

**α-(2,6-Dichlorophenyl)-6-[(2,4-difluorophenyl)thio]-3-pyridazineacetonitrile (10) (Table 3, entry 15).** 6-Chloro-α-(2,6-dichlorophenyl)-3-pyridazineacetonitrile (**9**) (150 mg, 0.5 mmol) was added to a stirred solution of (±)-*trans*-cyclohexane-1,2-diol (118 mg, 1.0 mmol), K<sub>2</sub>CO<sub>3</sub> (140 mg, 1.0 mmol) and 2,4-difluorothiophenol (57 μL, 0.5 mmol), in propan-2-ol (3 mL). The solution was irradiated at 120 °C for 3 x 1 h in a pressure-rated glass tube (10 mL) using a CEM Discover microwave synthesiser by moderating the initial power (150 W). After cooling in a flow of compressed air, the reaction mixture was filtered on SiO<sub>2</sub>, washing with MeOH, and evaporated *in vacuo*. Purification by column chromatography on SiO<sub>2</sub>, gradient eluting with Et<sub>2</sub>O–hexane (1:5 to 1:1), gave the *title compound* as an orange solid (190 mg, 92%), with identical physical and spectroscopic properties.

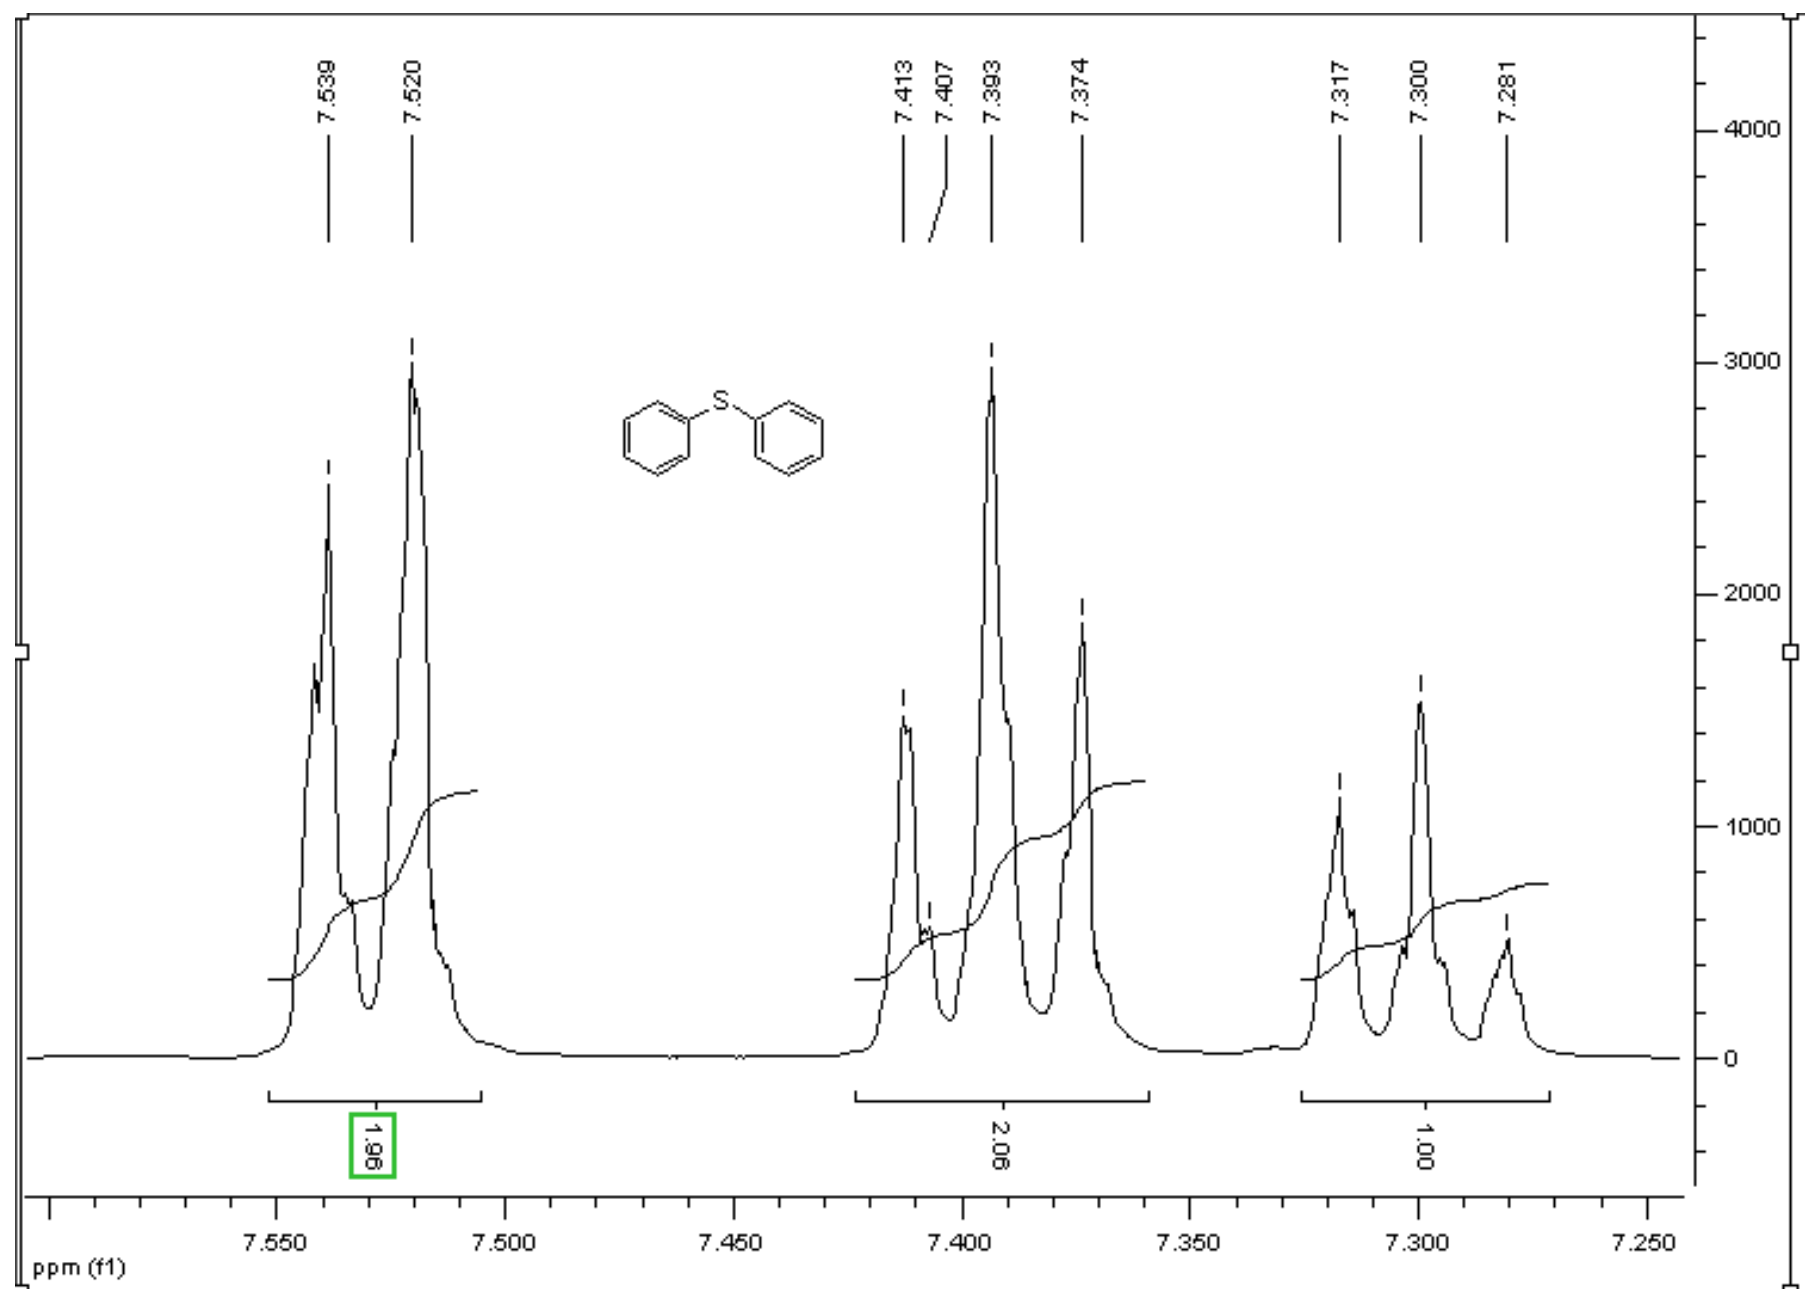

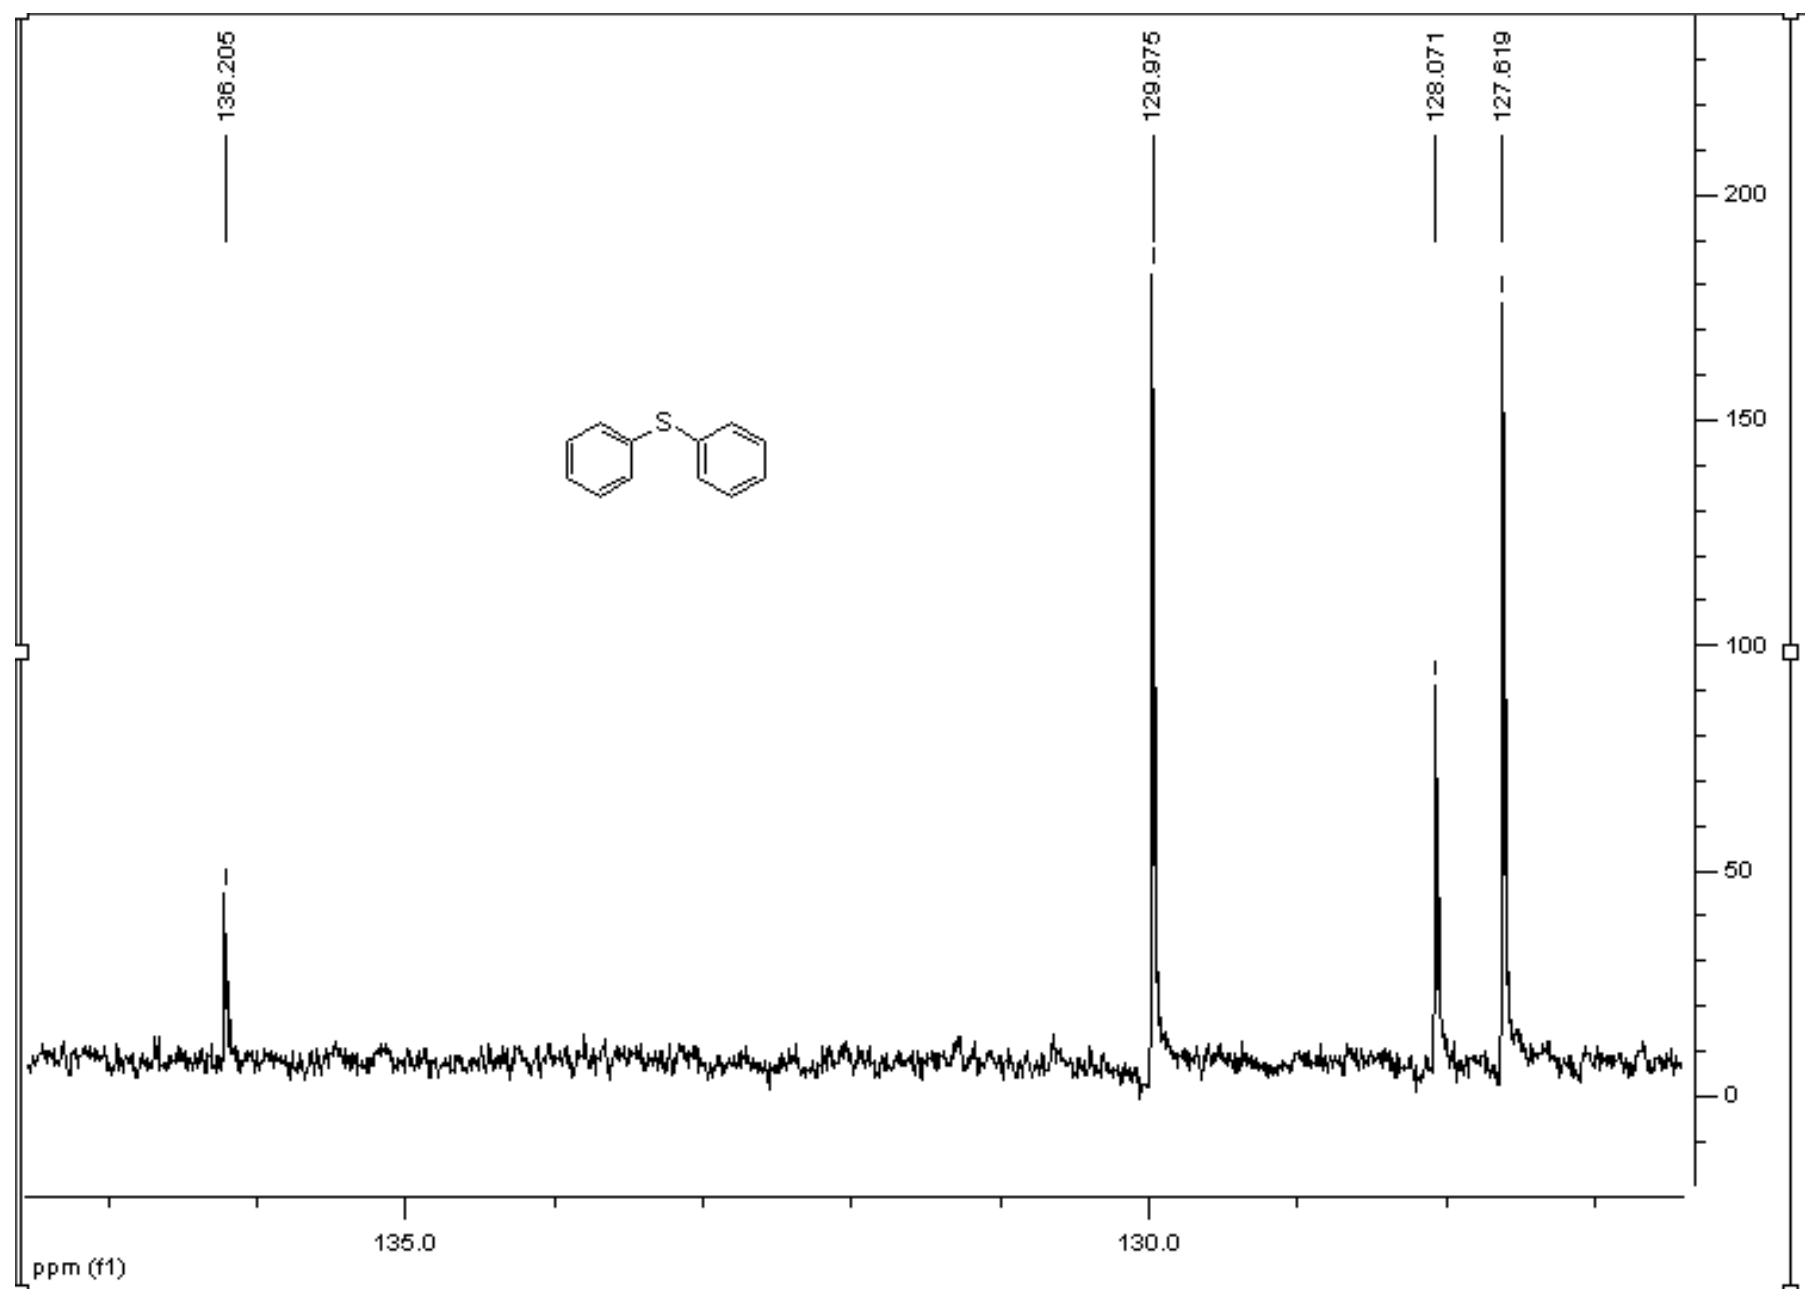

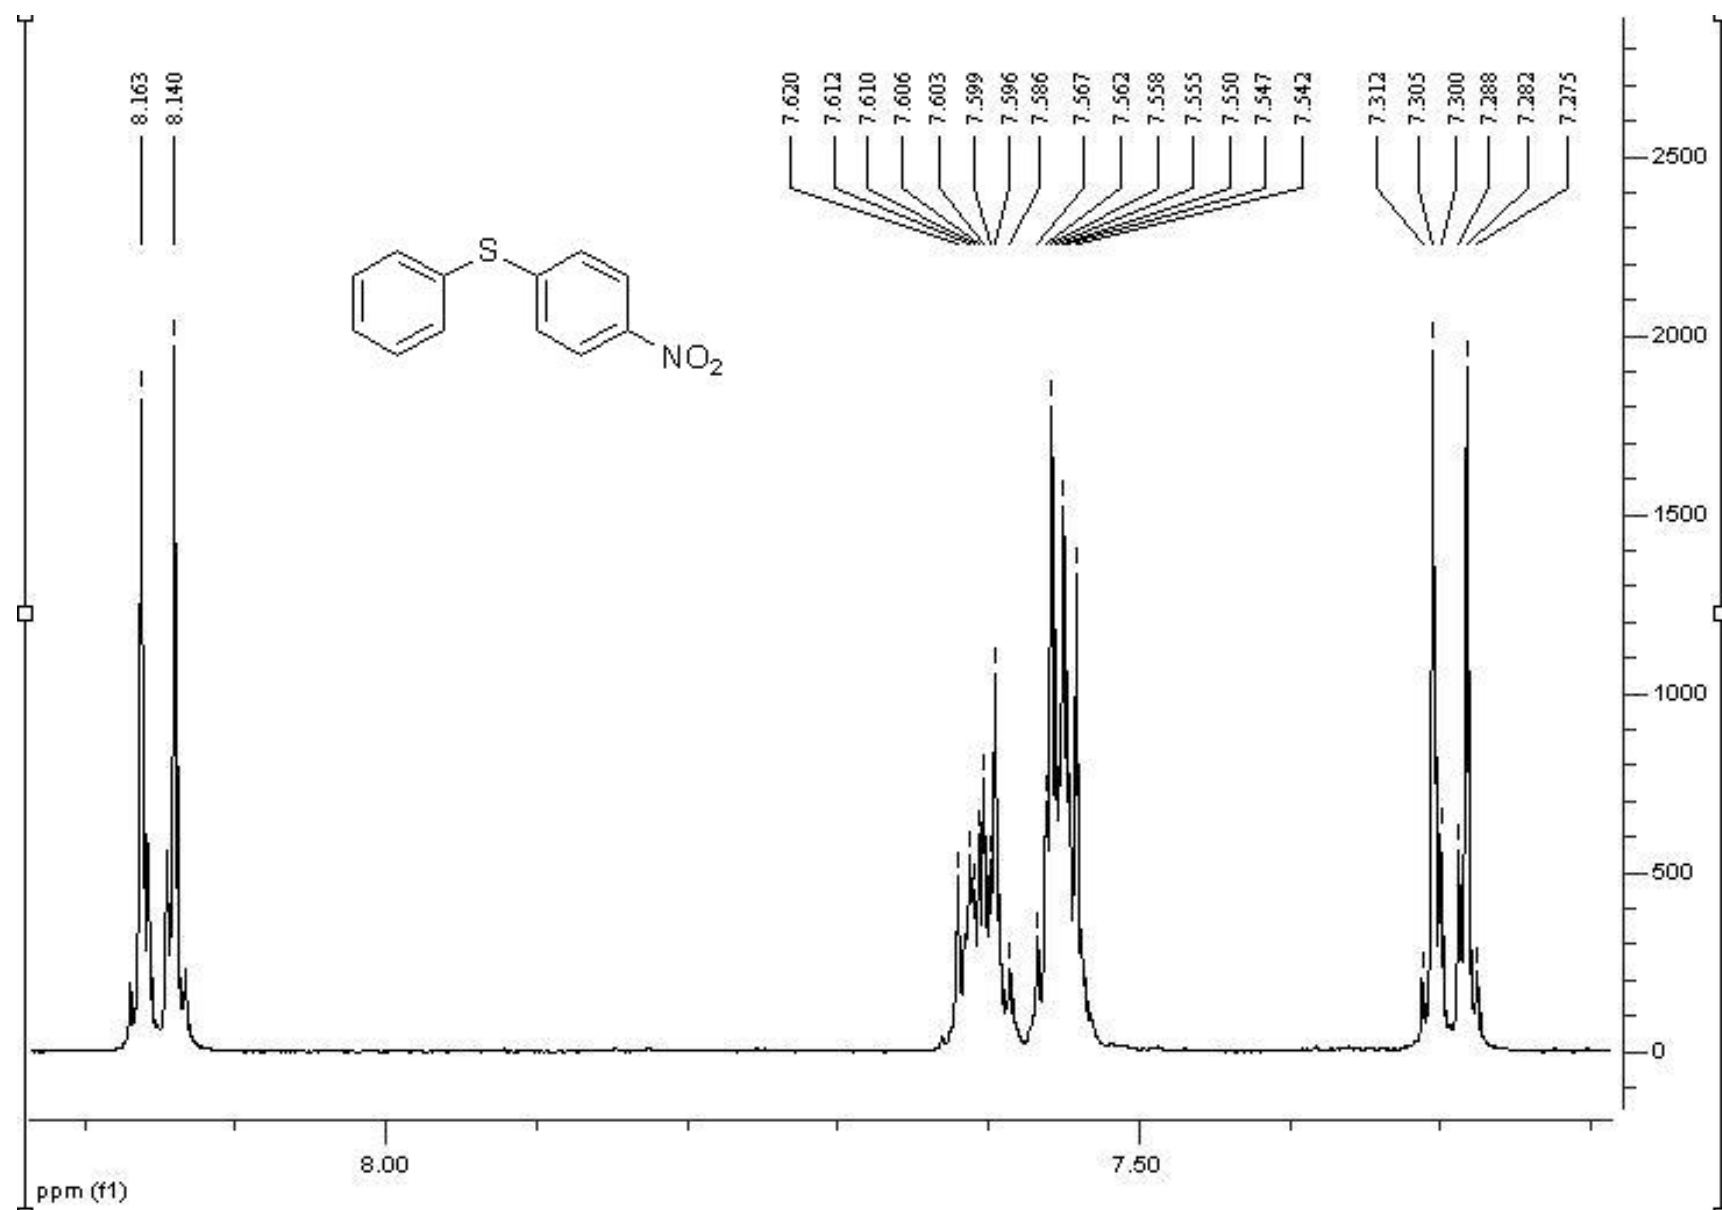

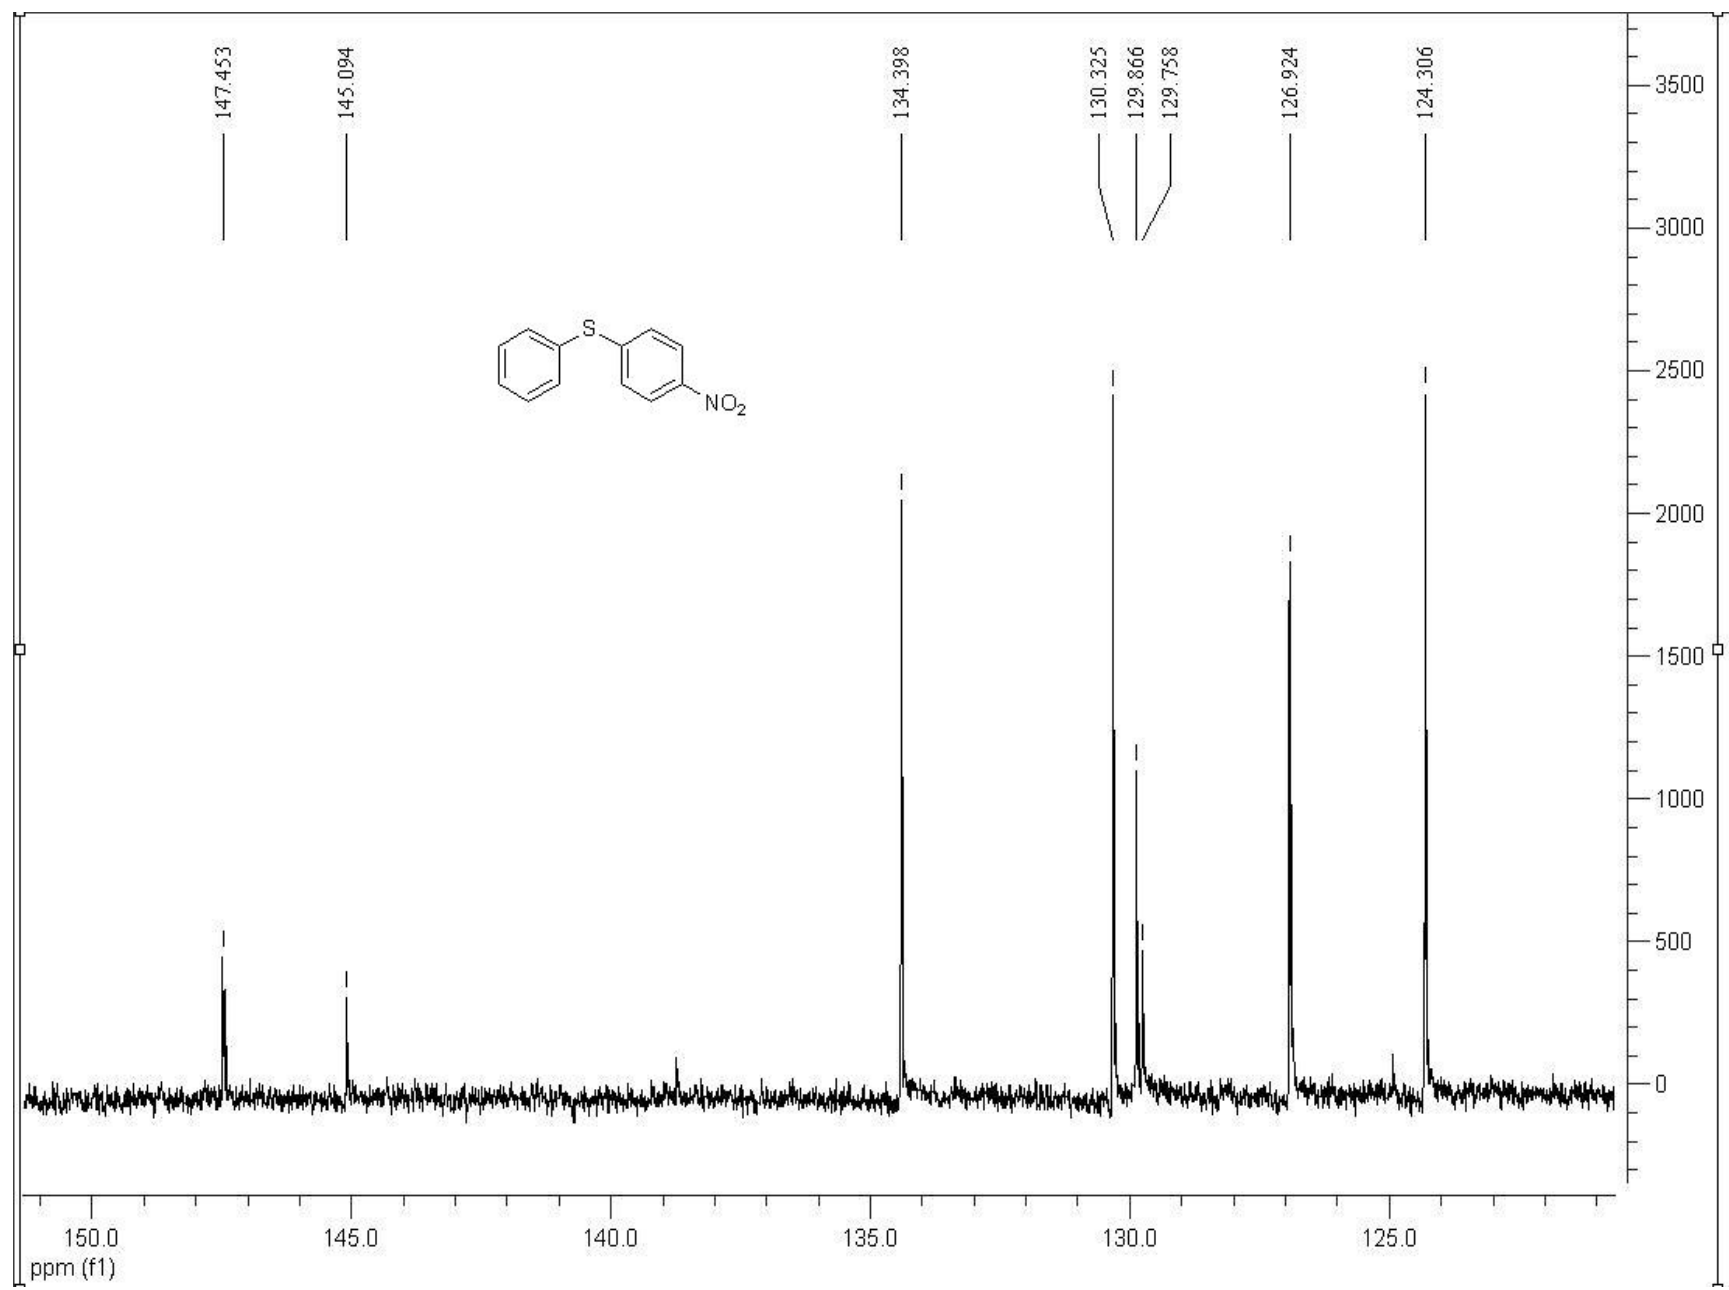

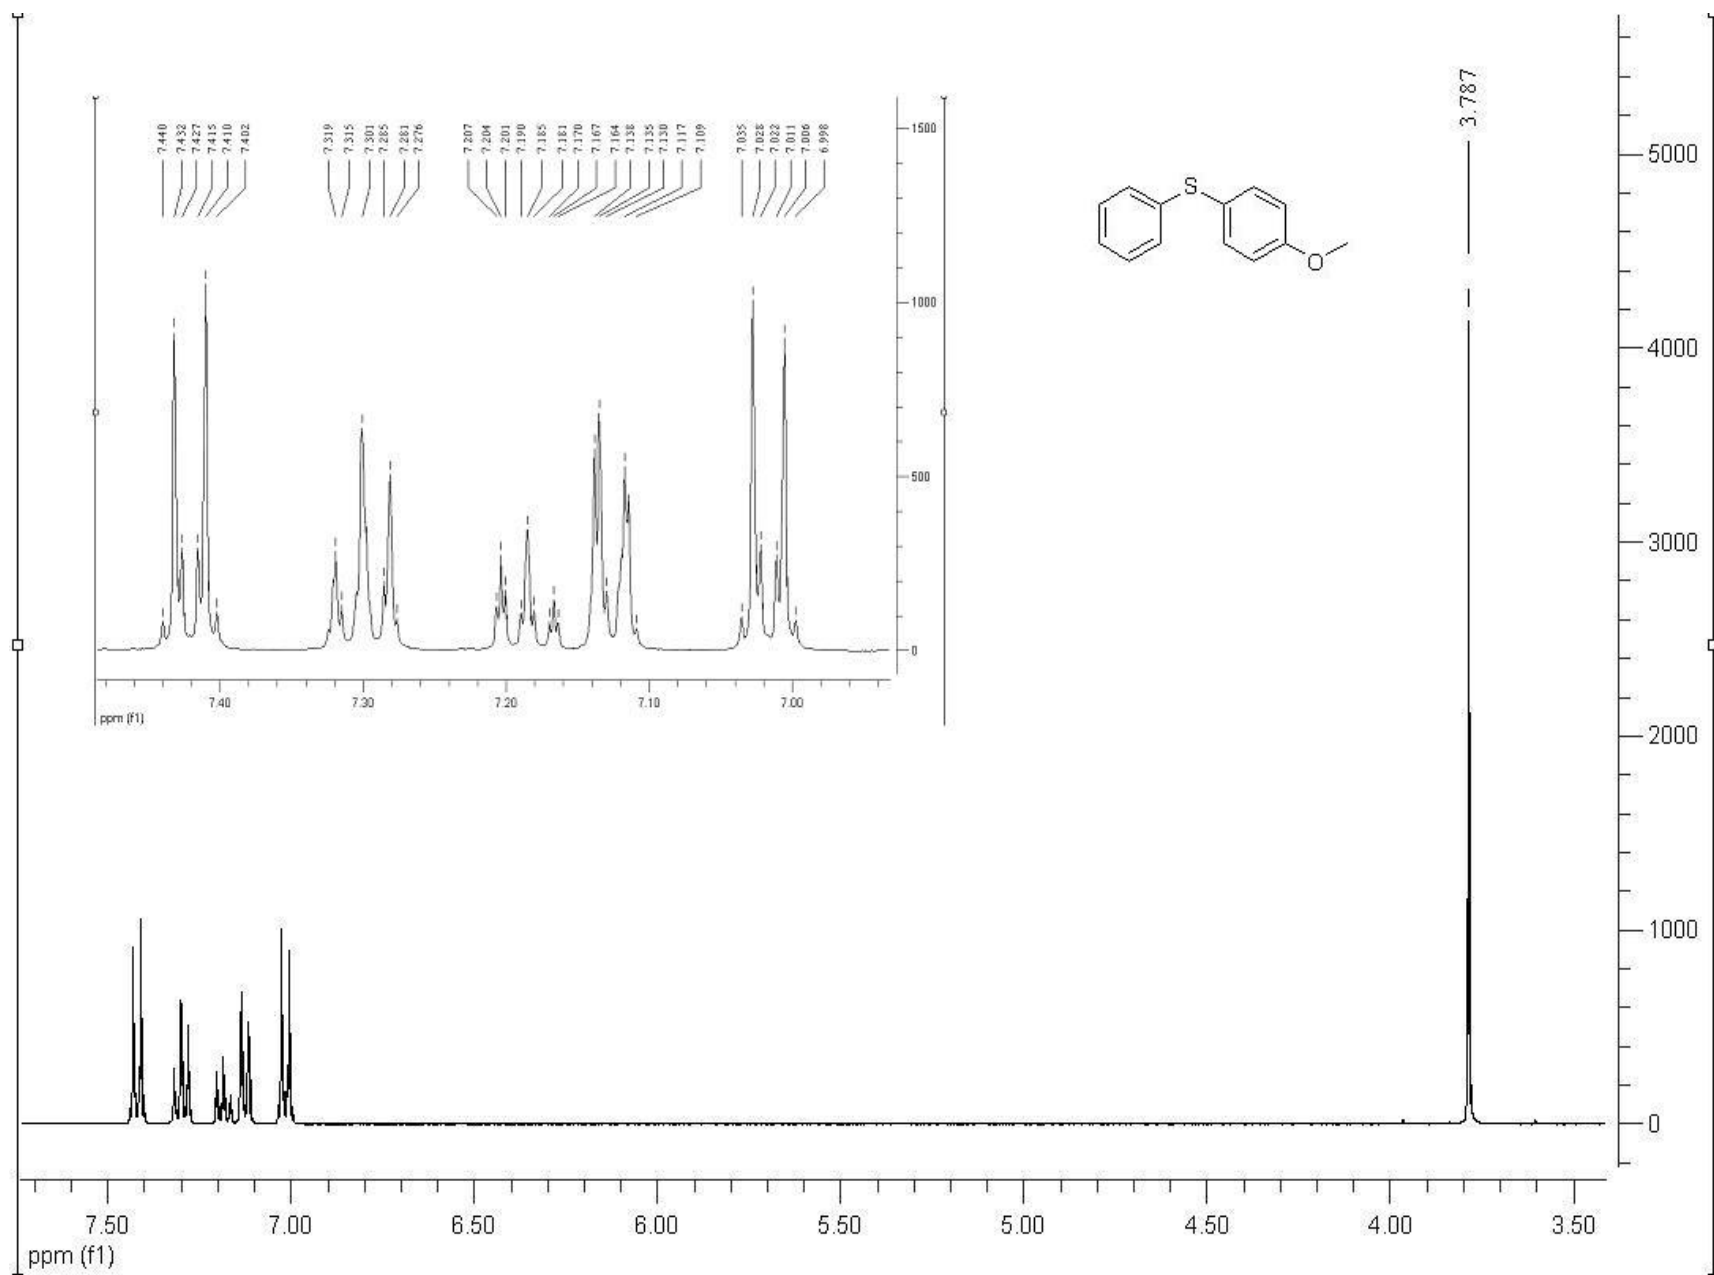

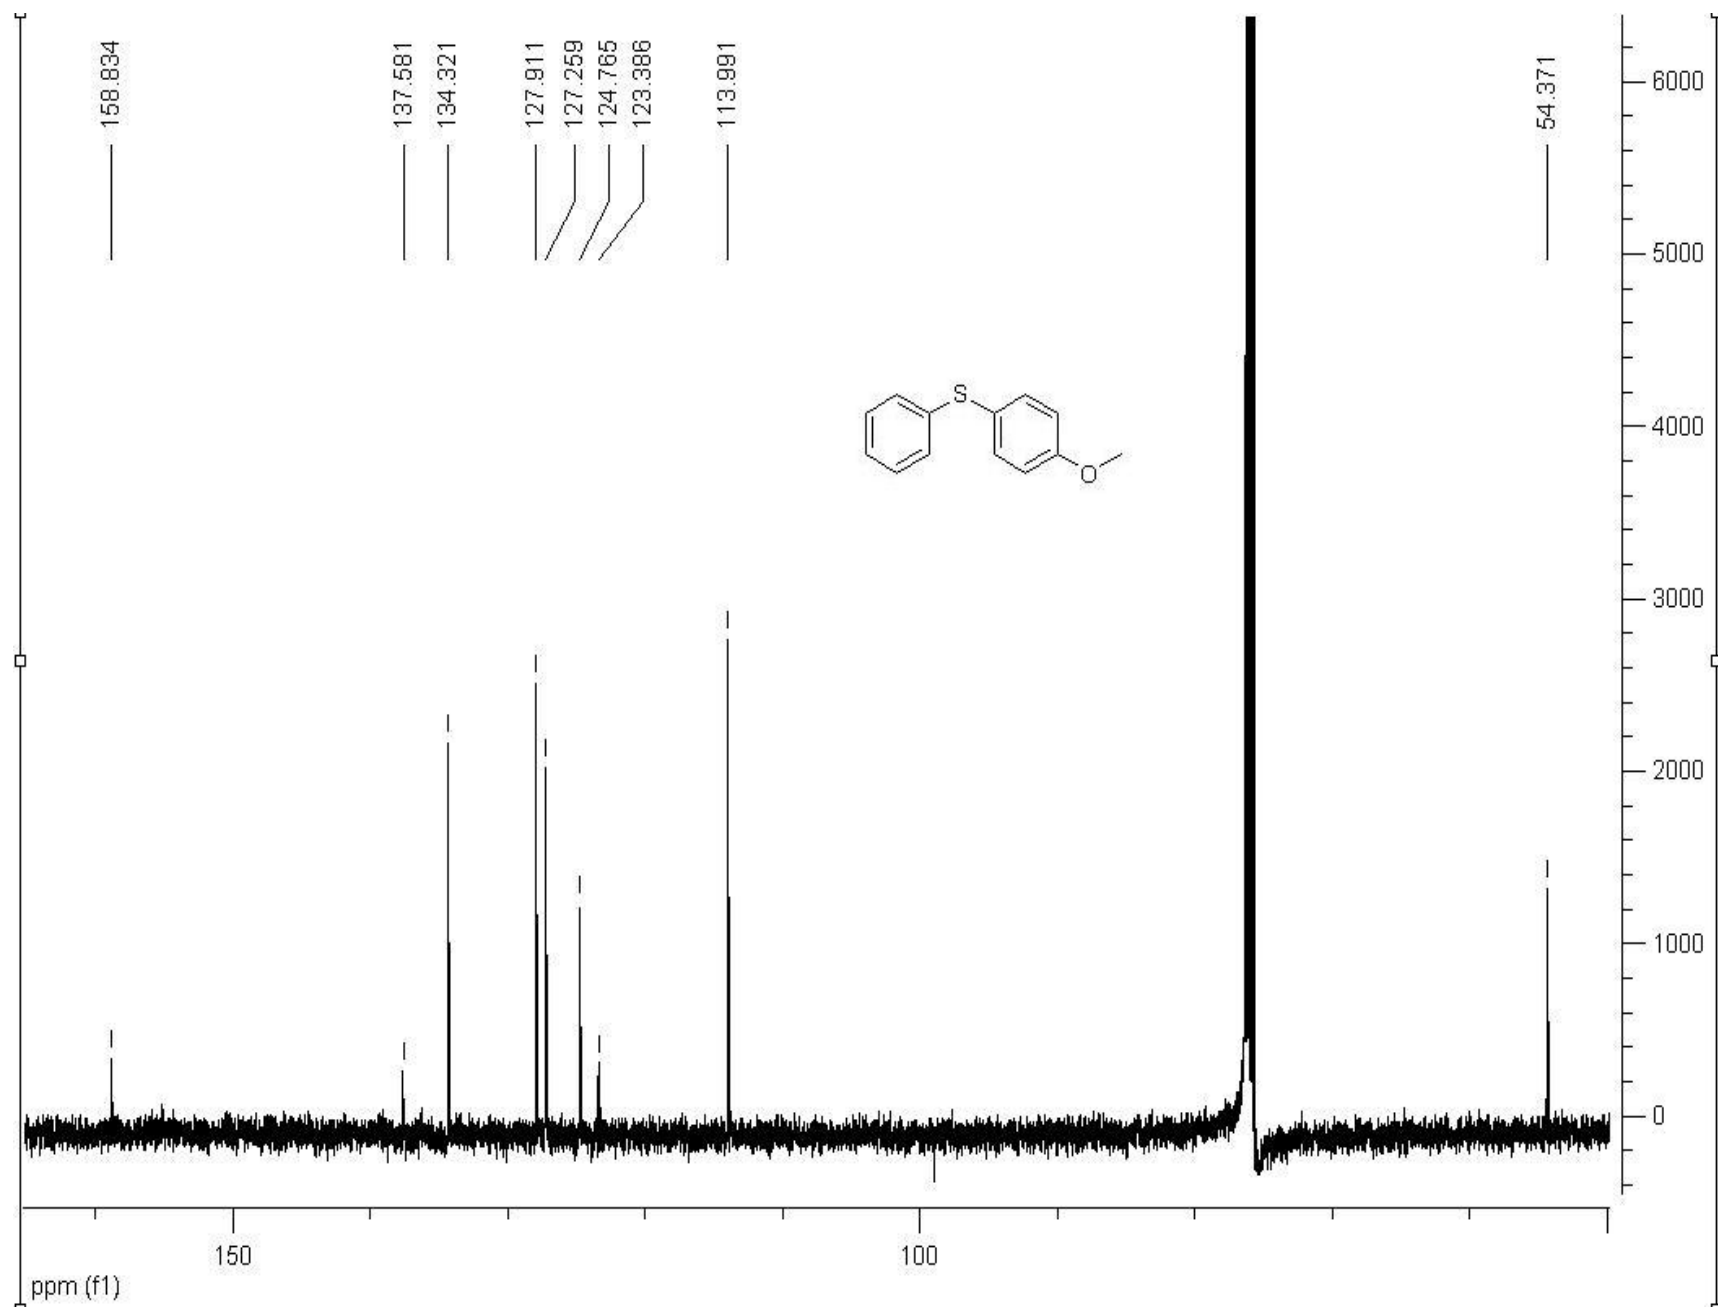



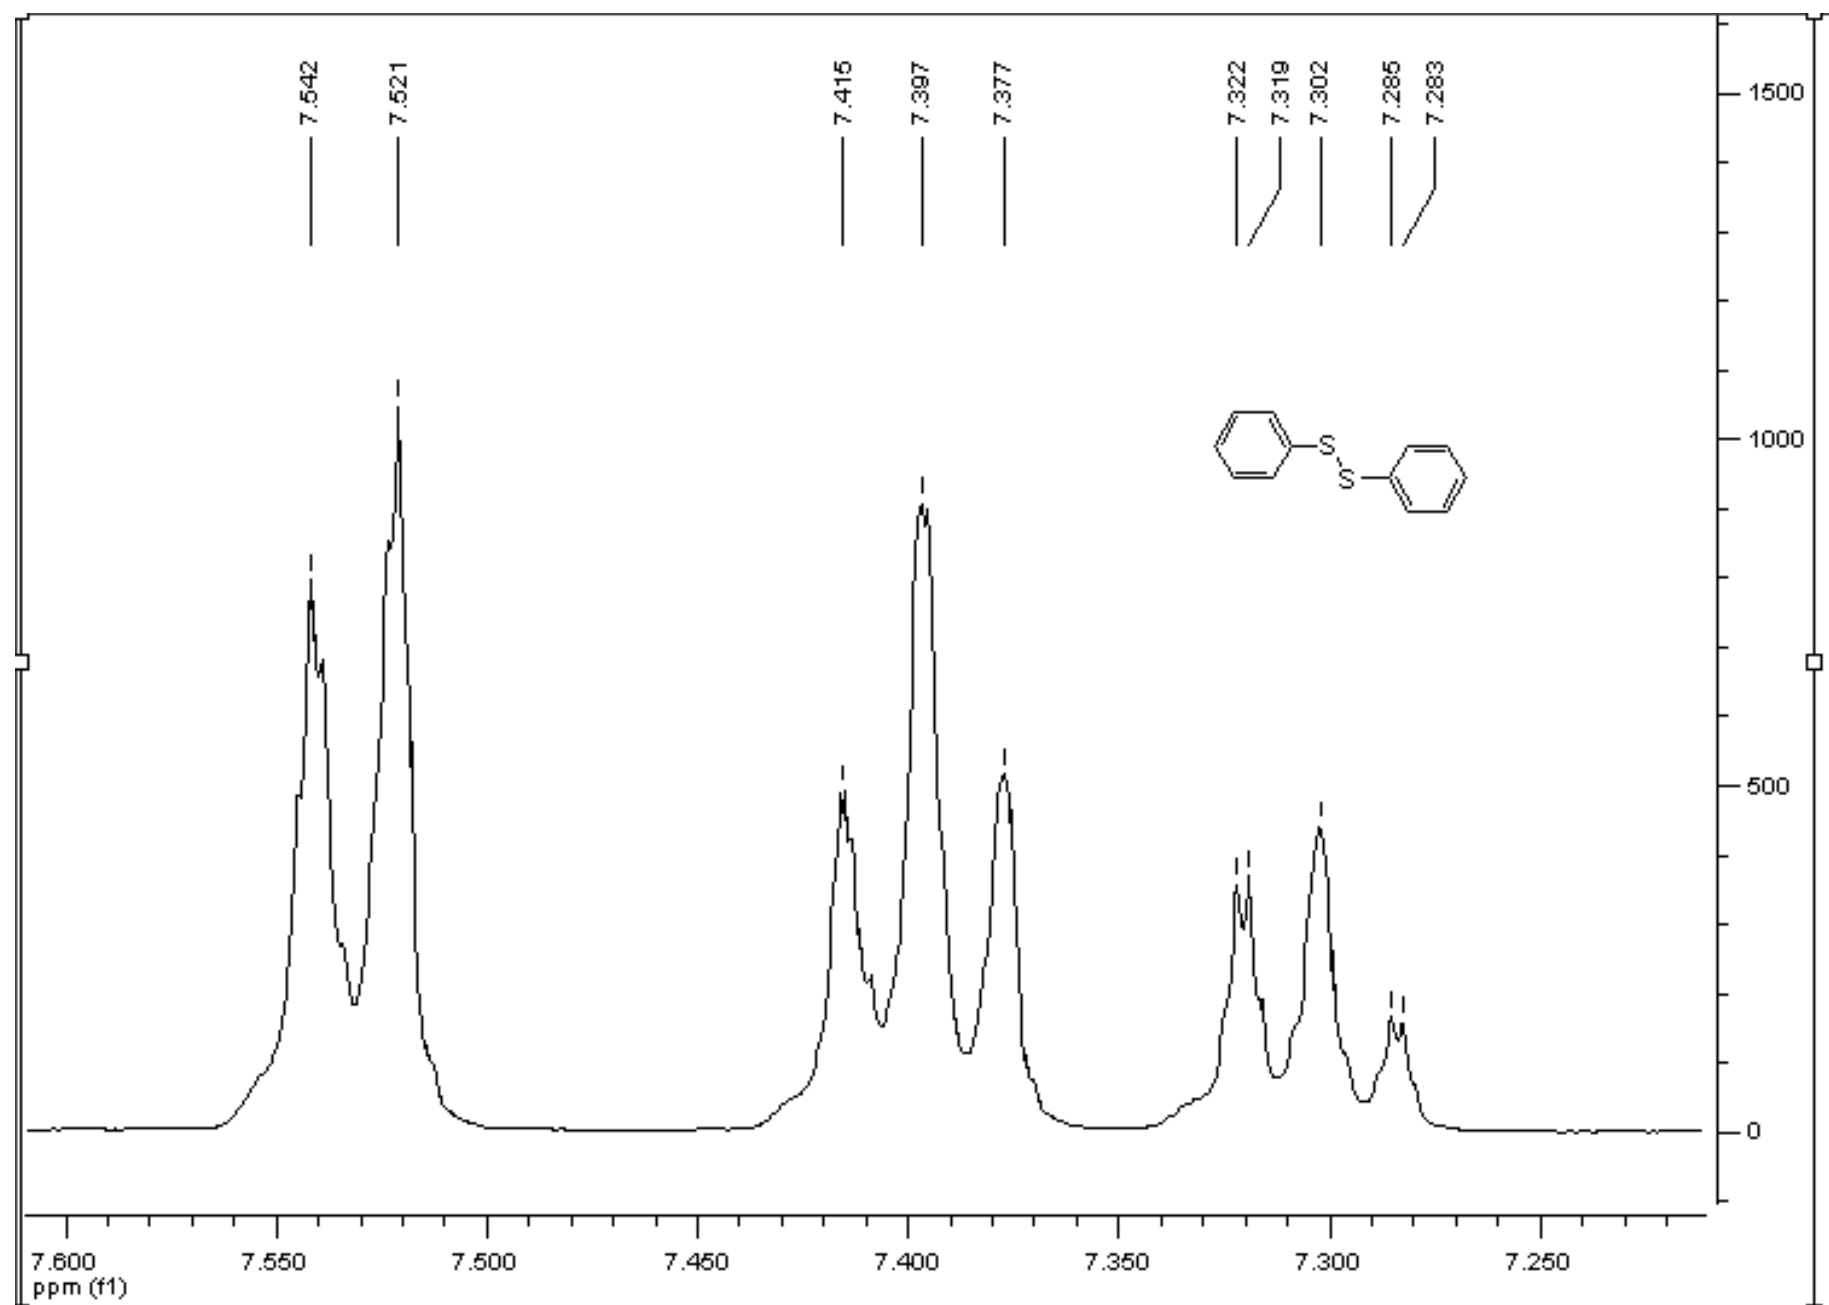

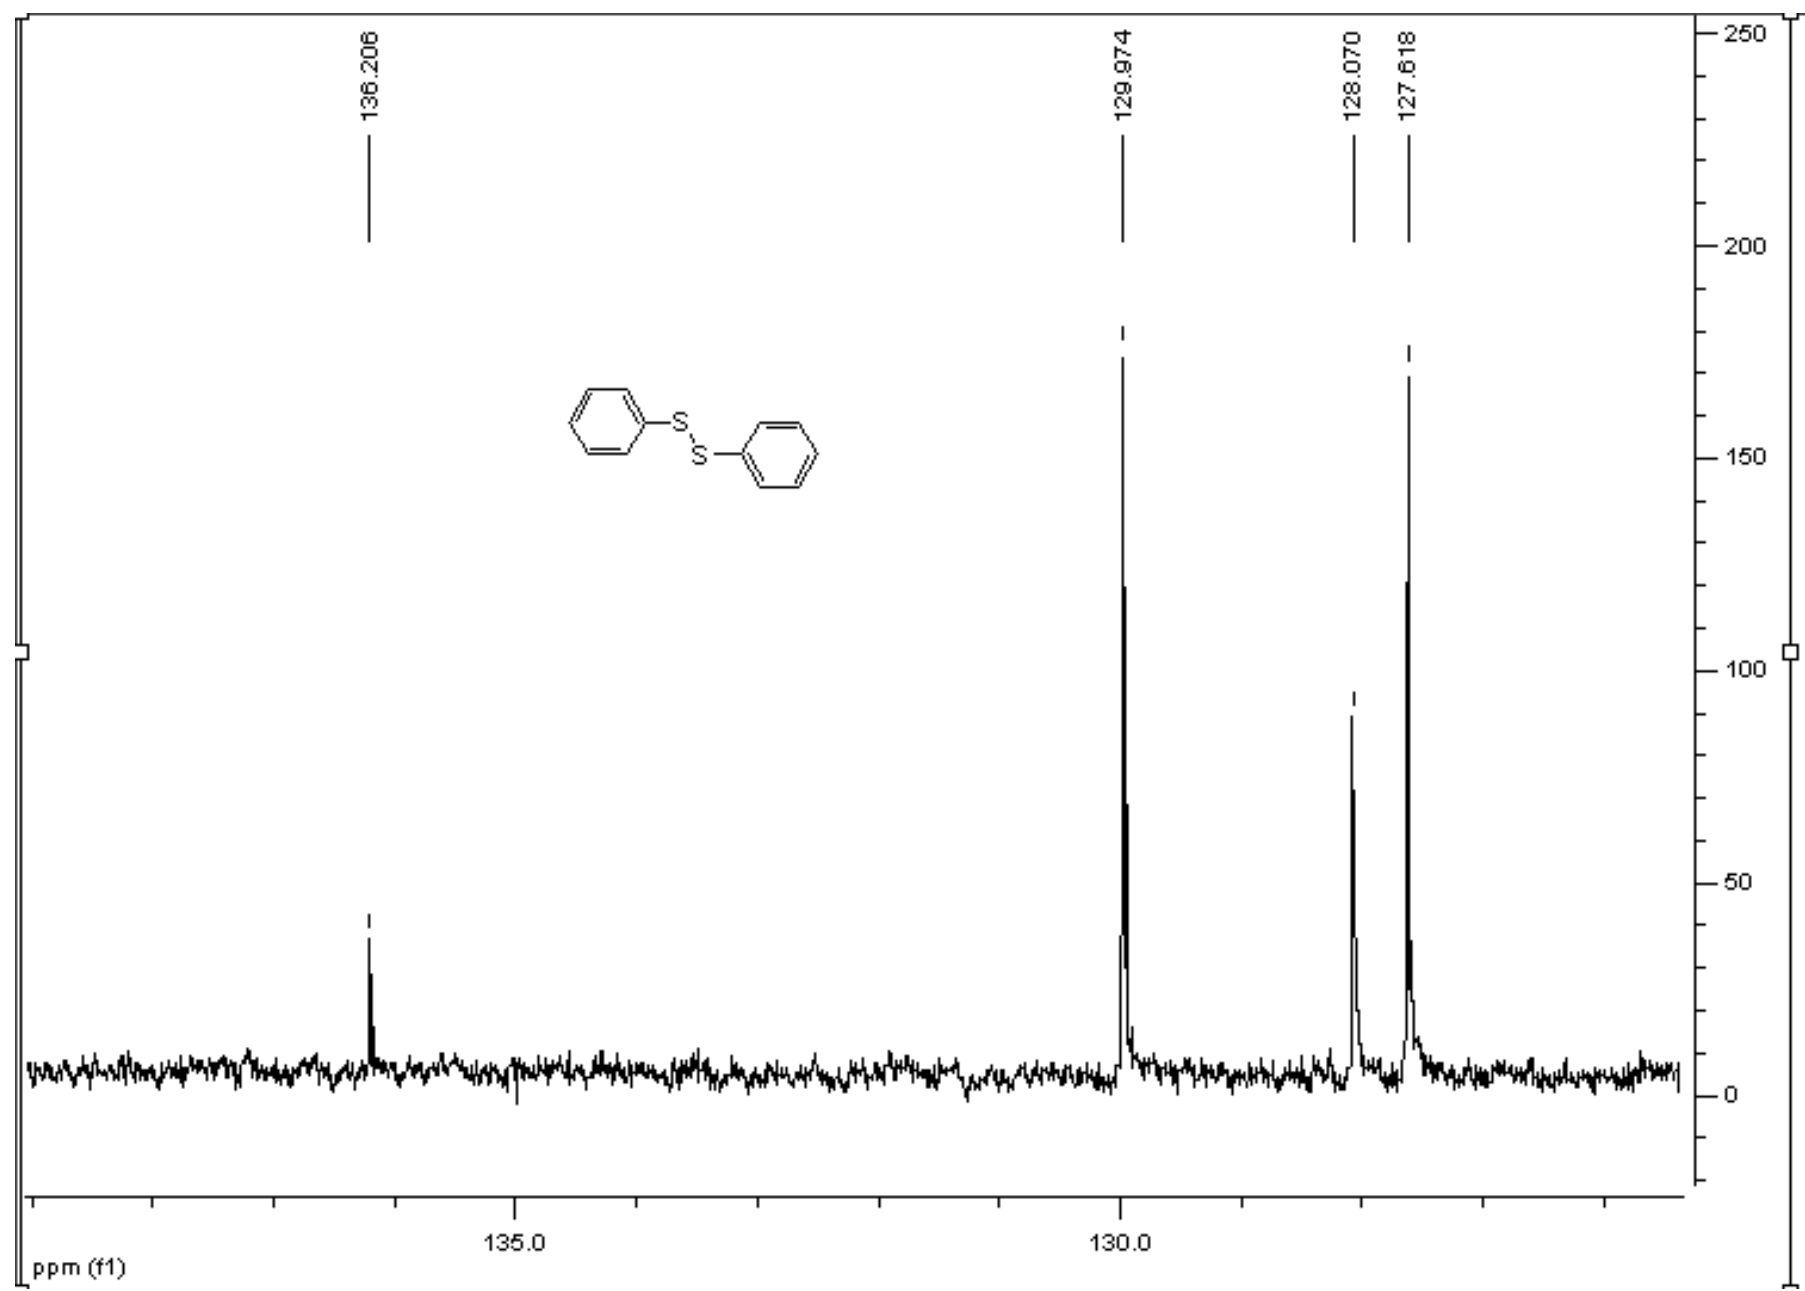

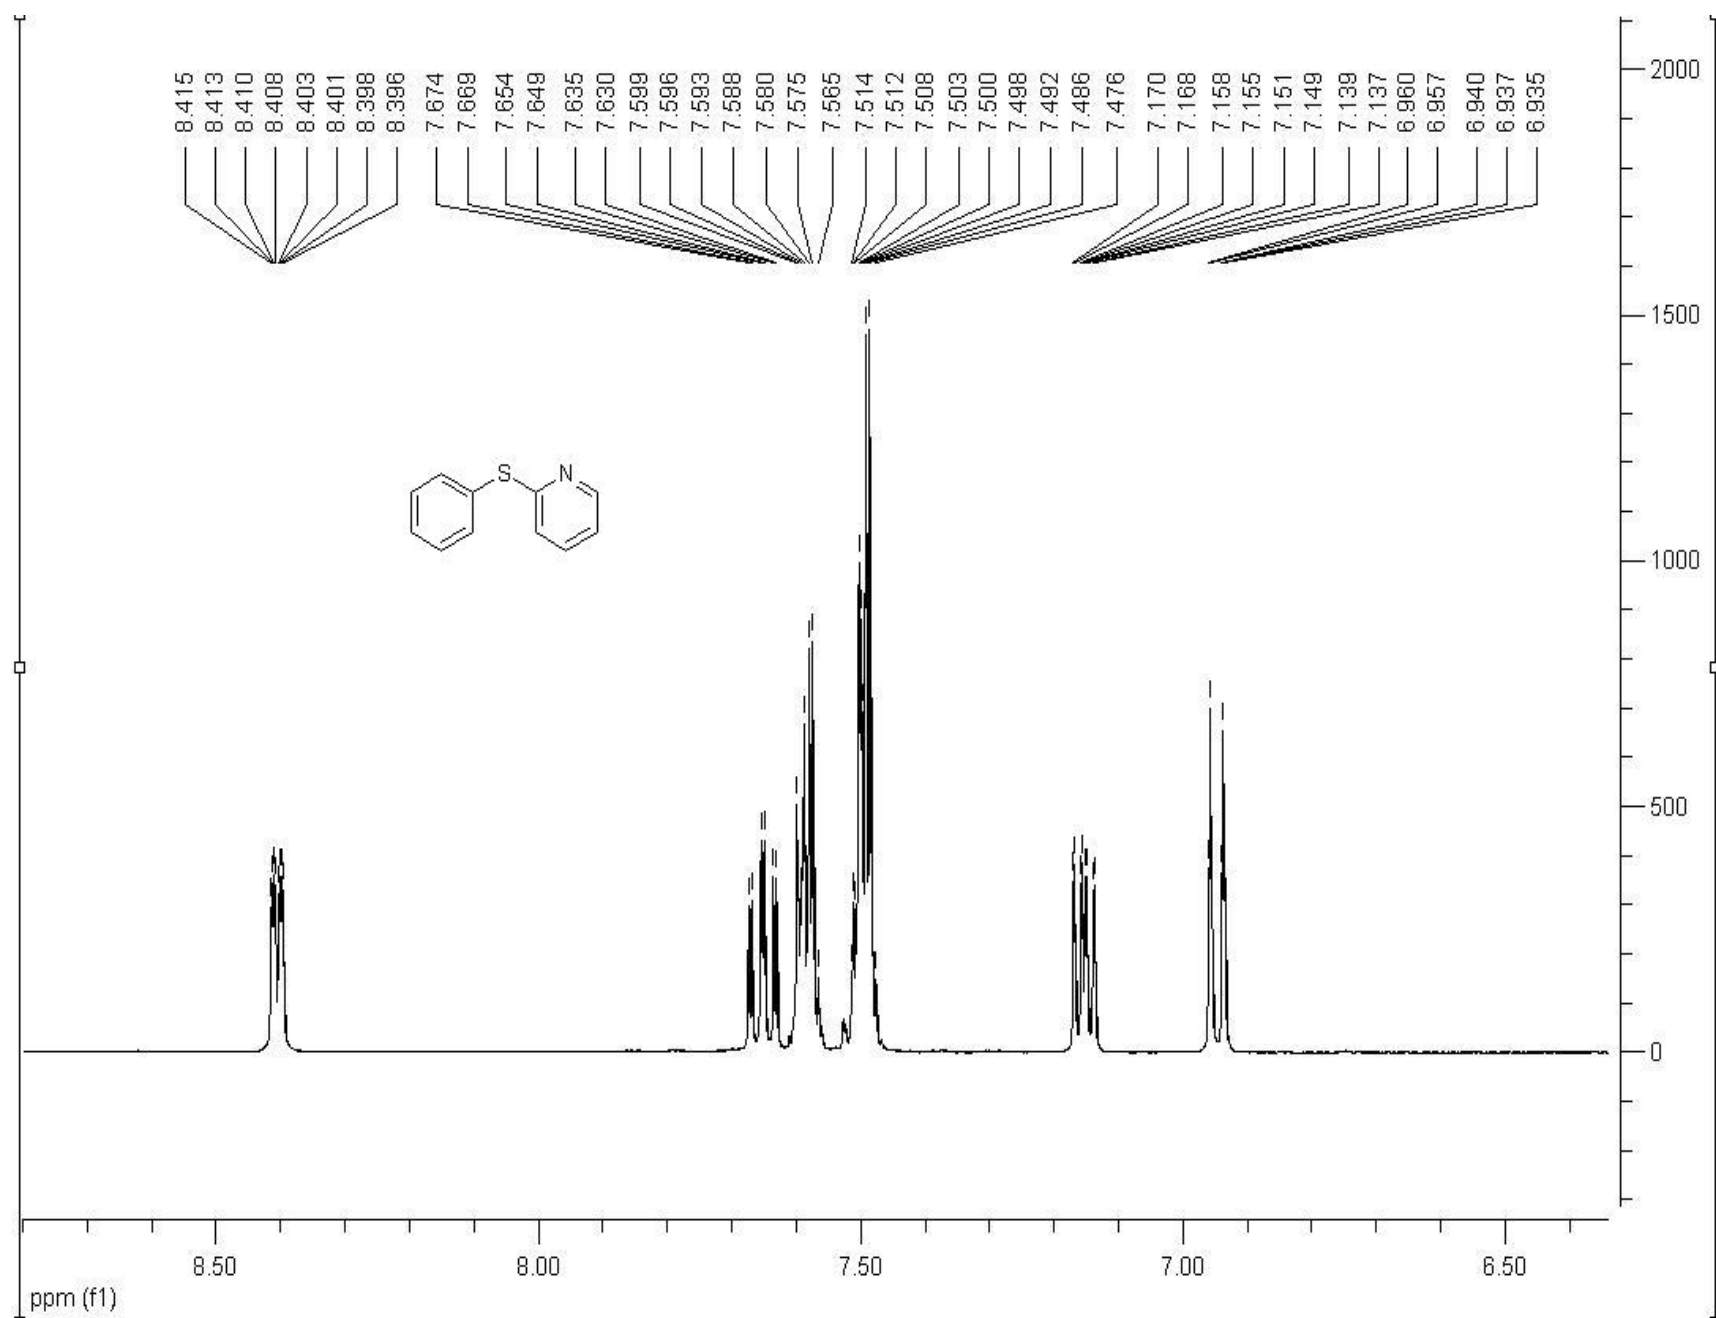

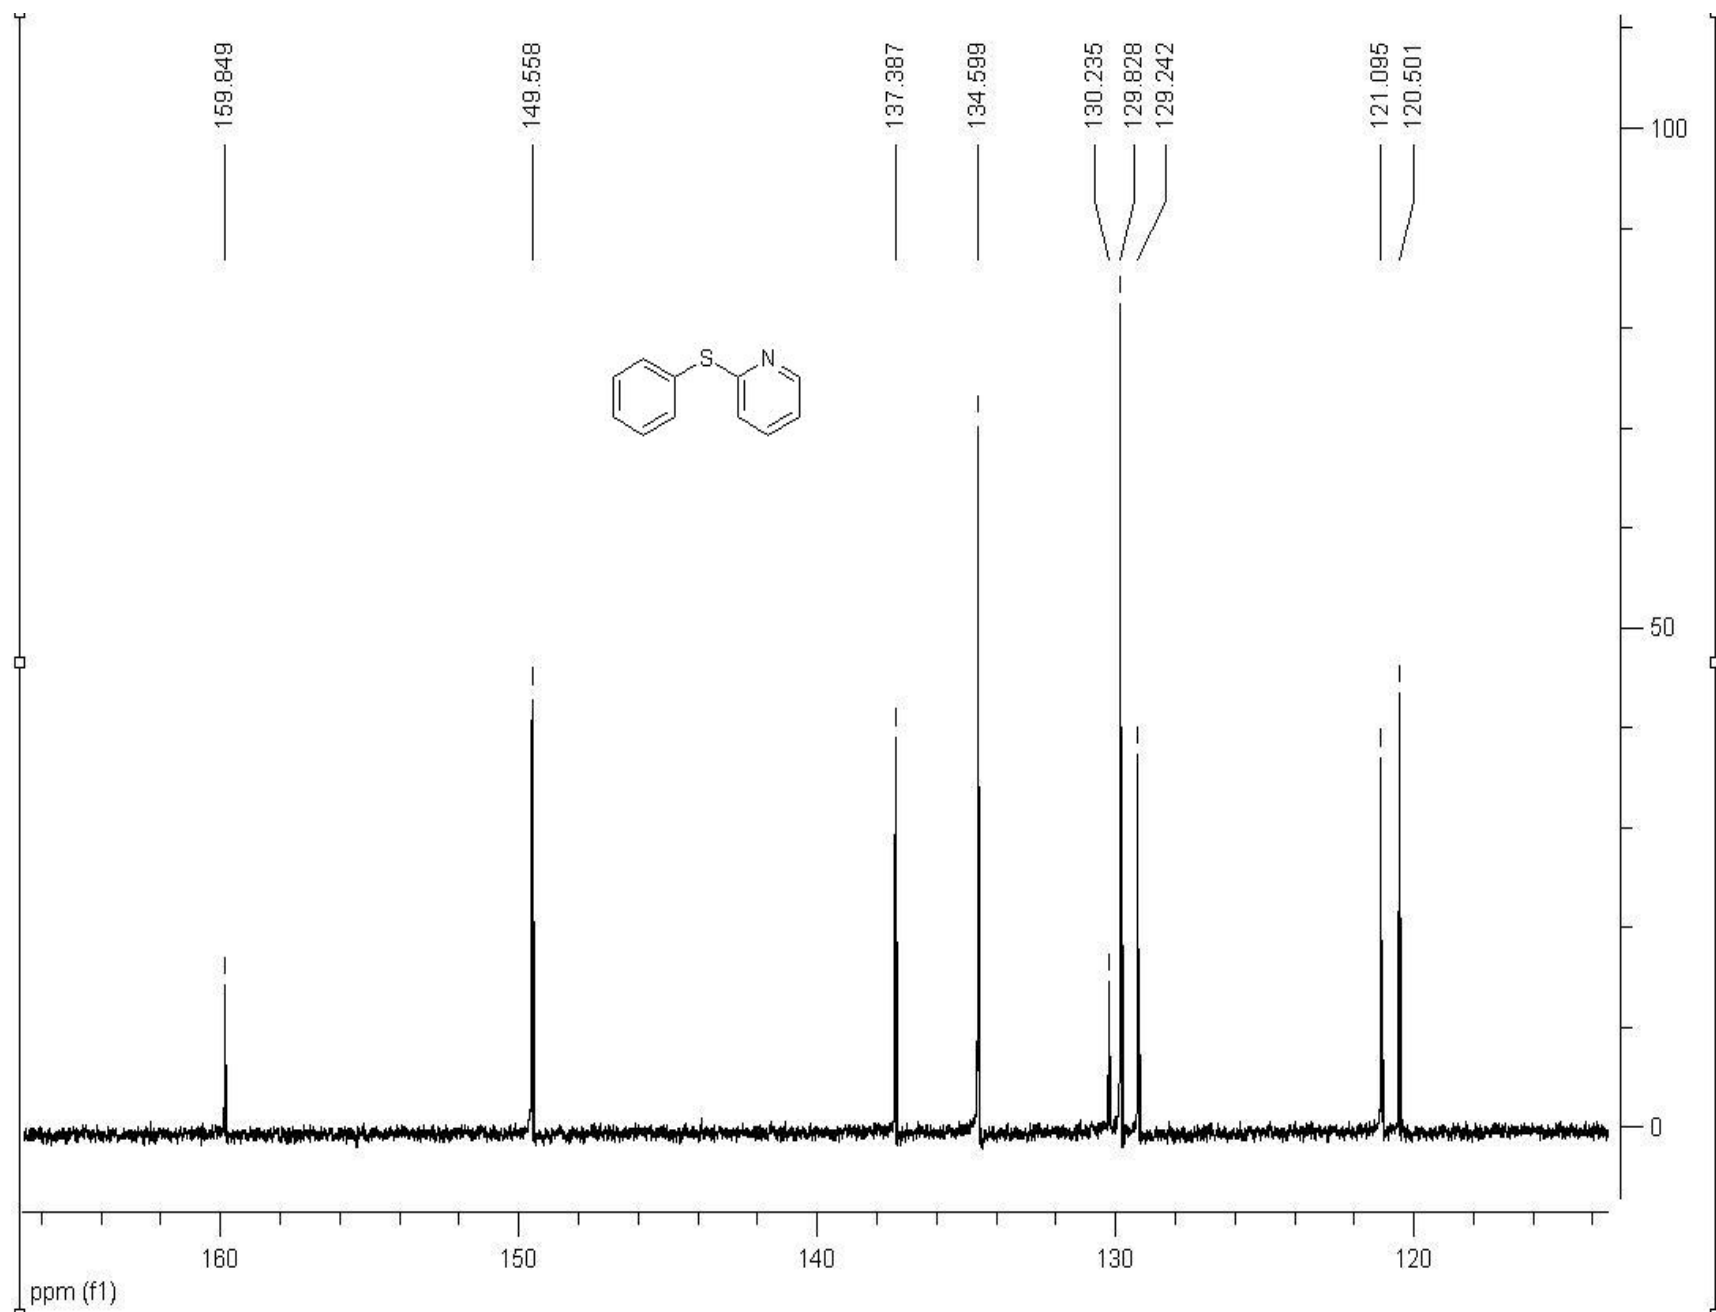

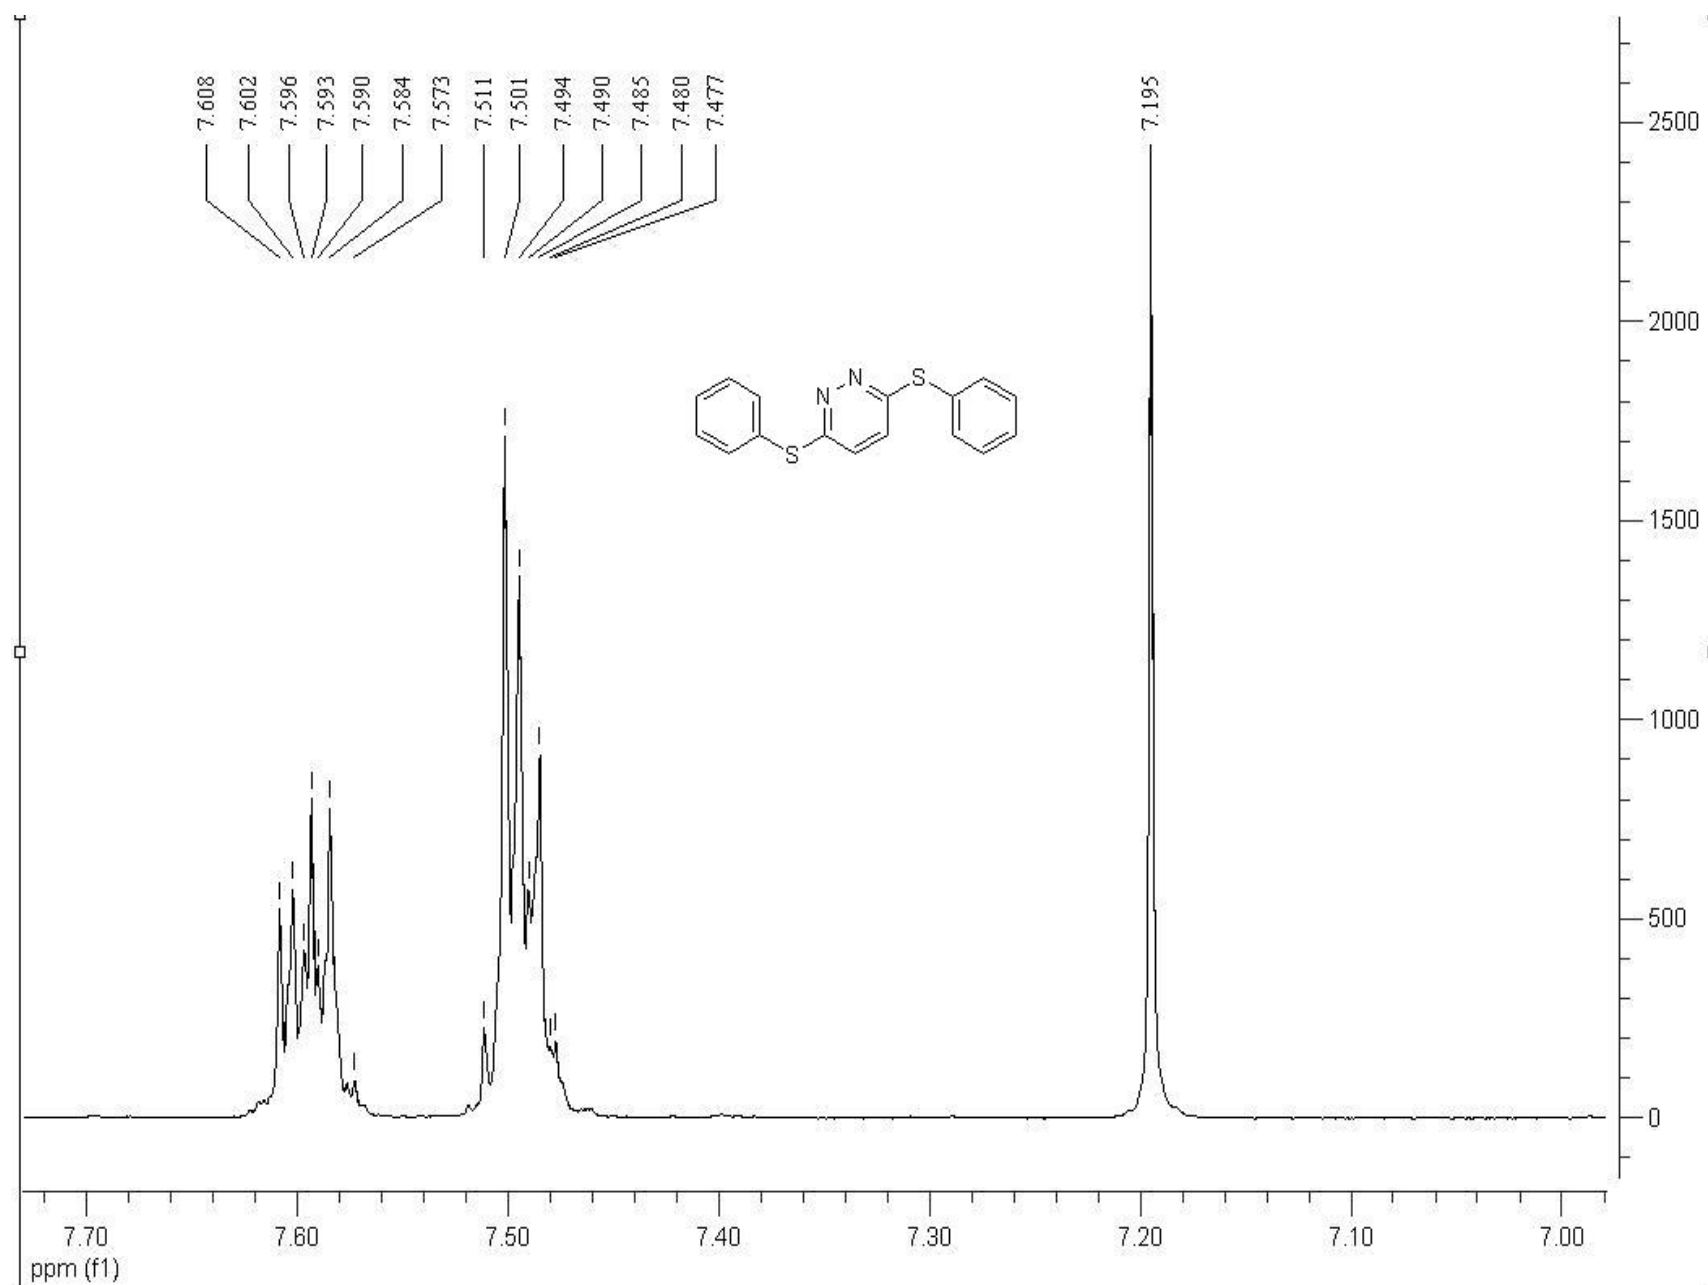

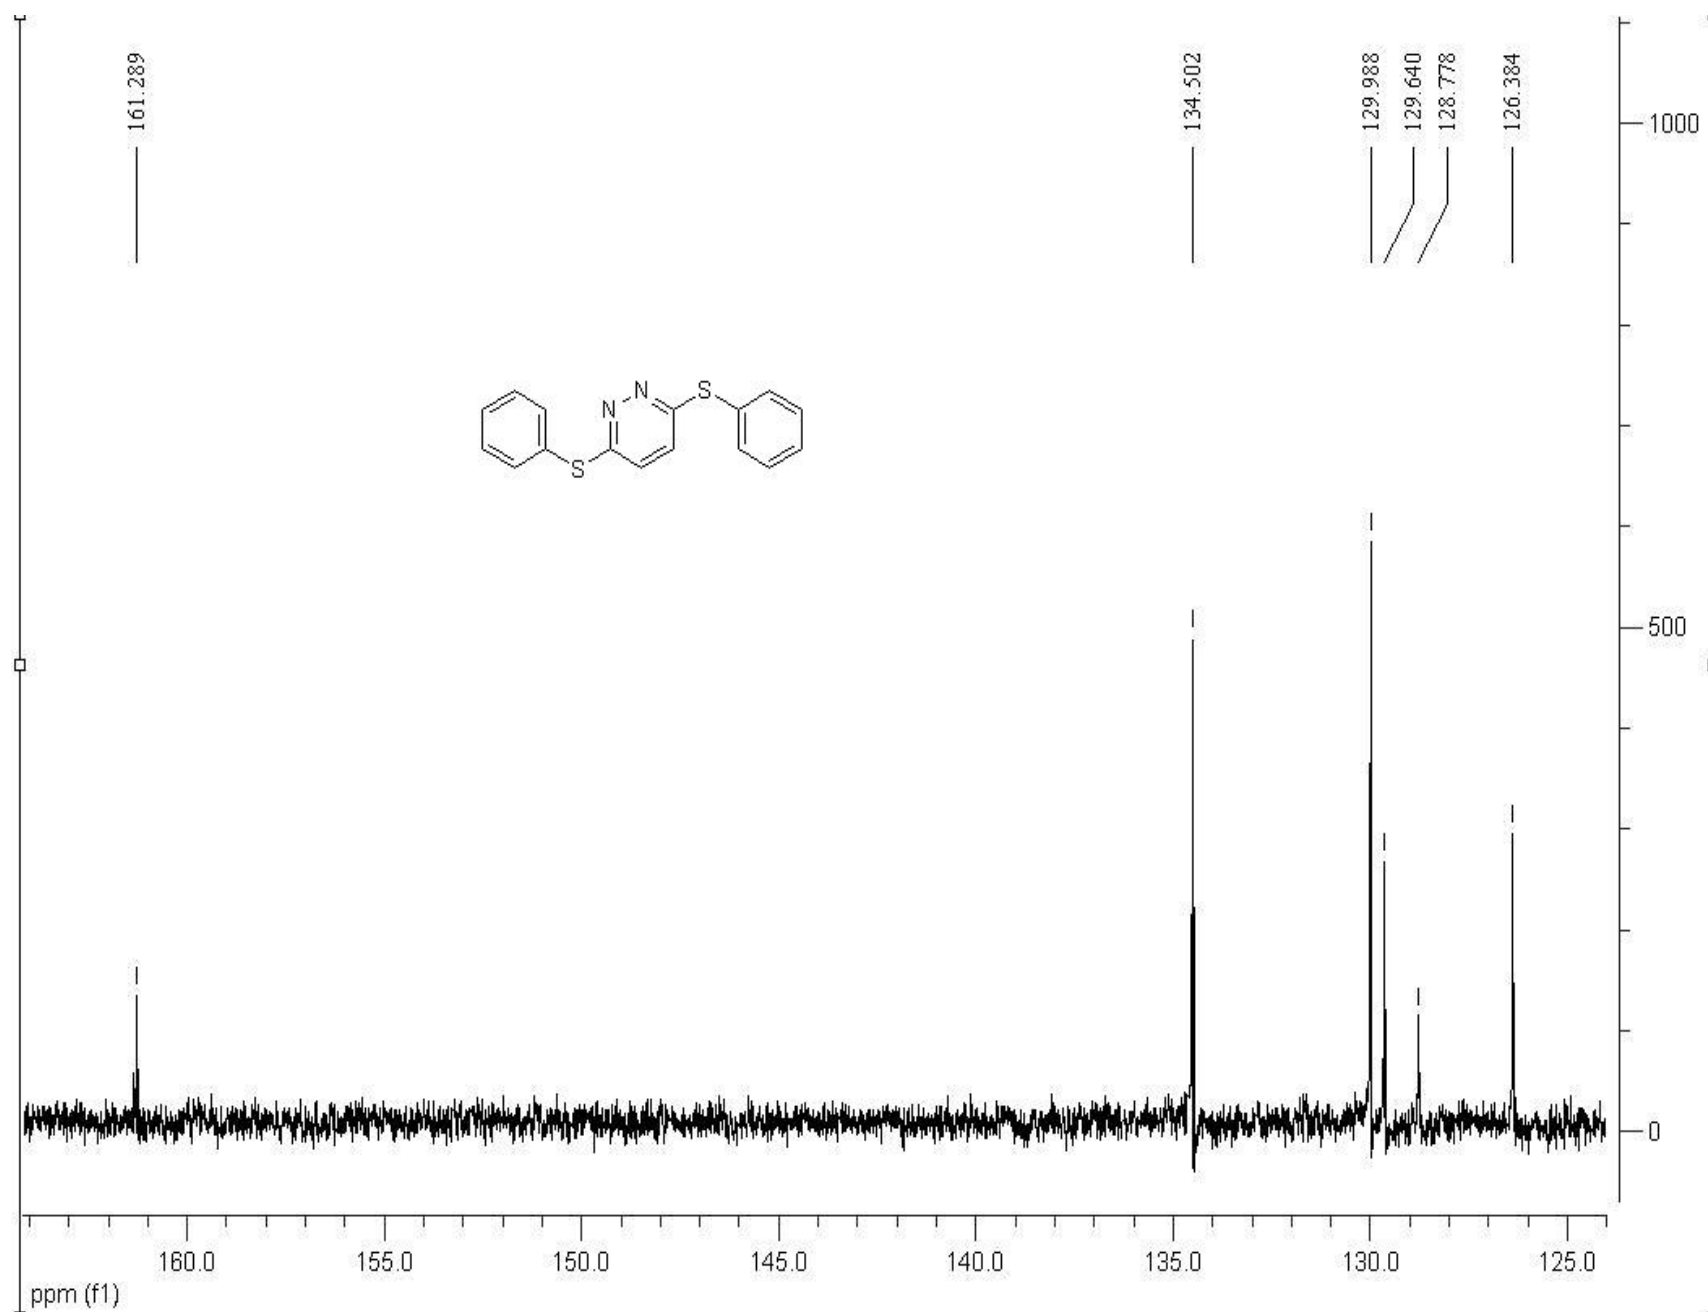

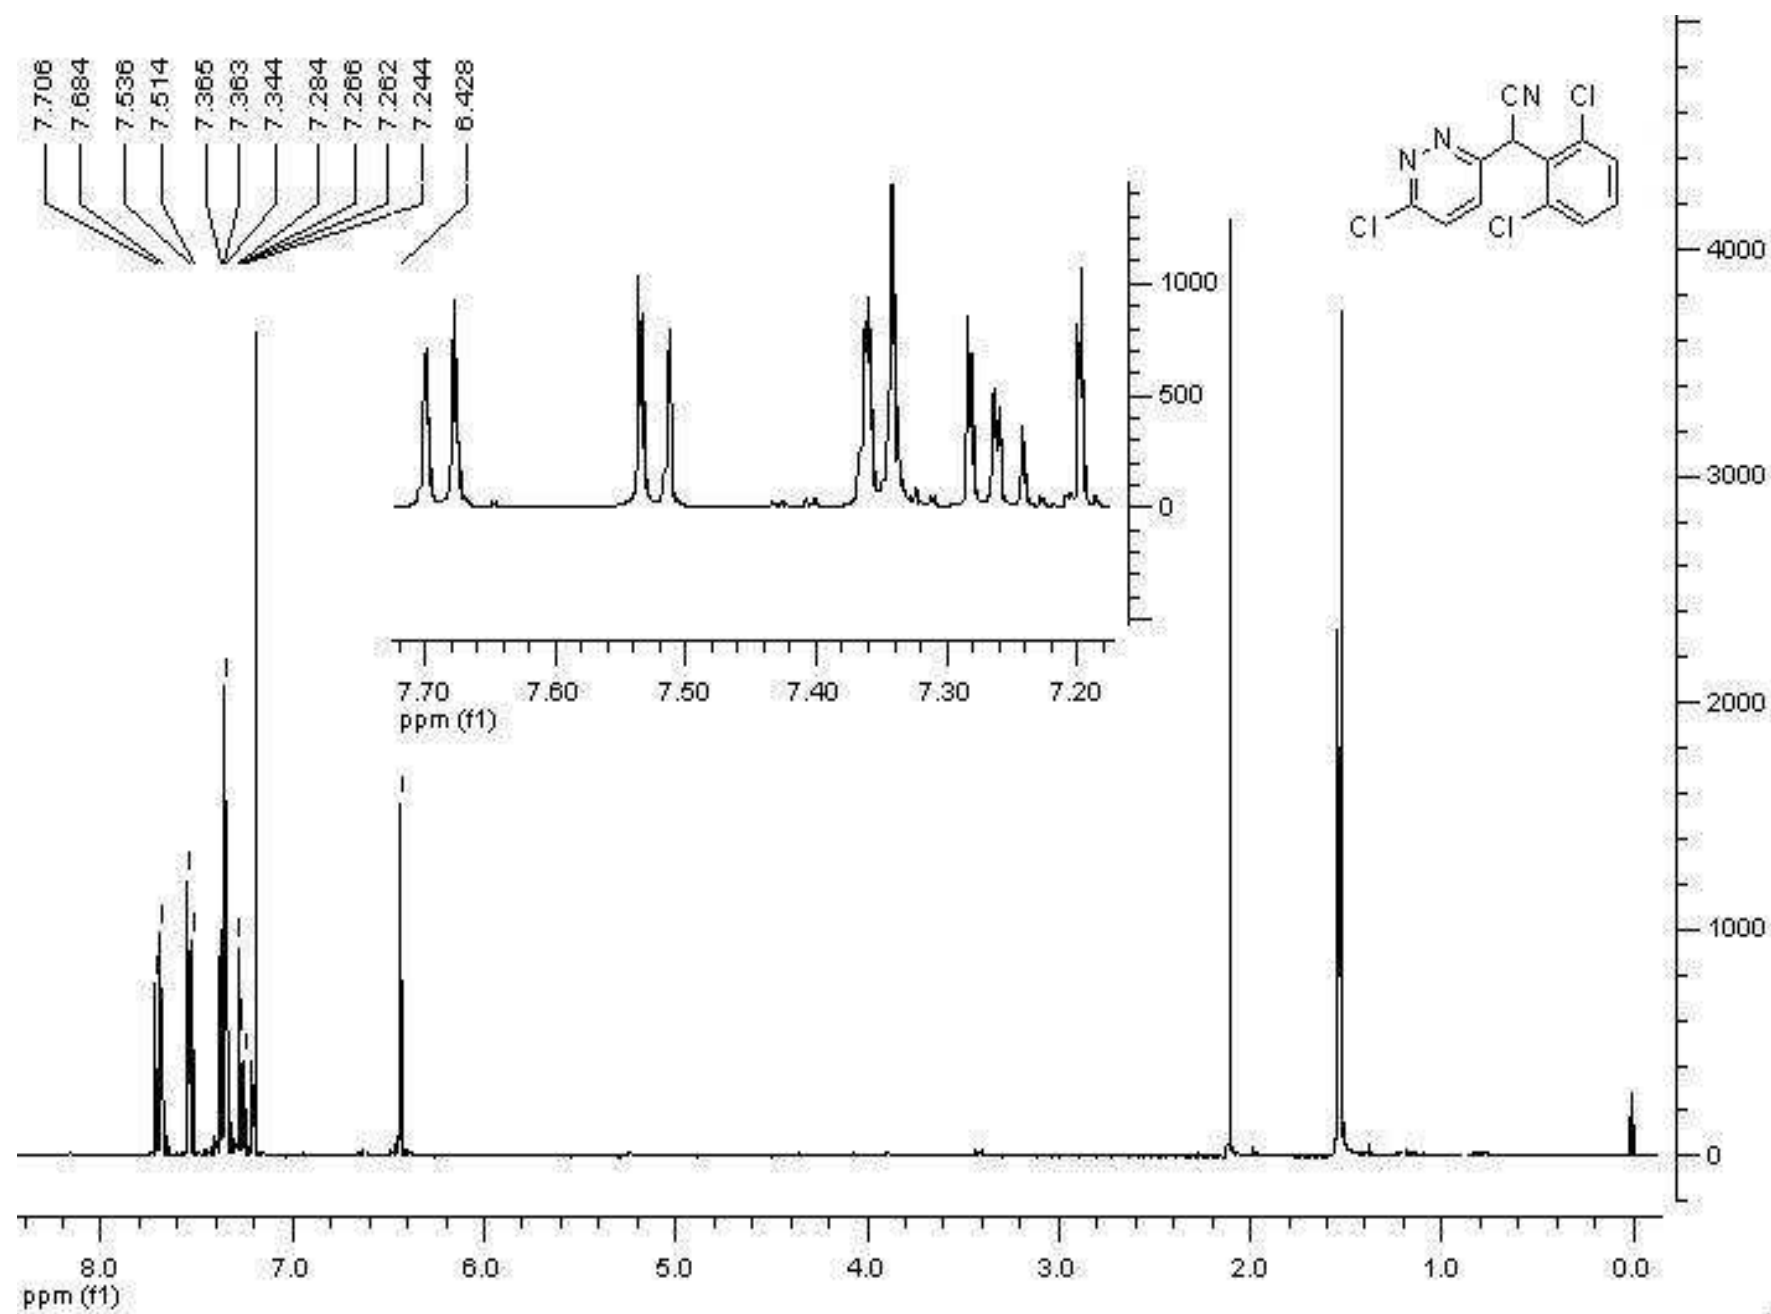

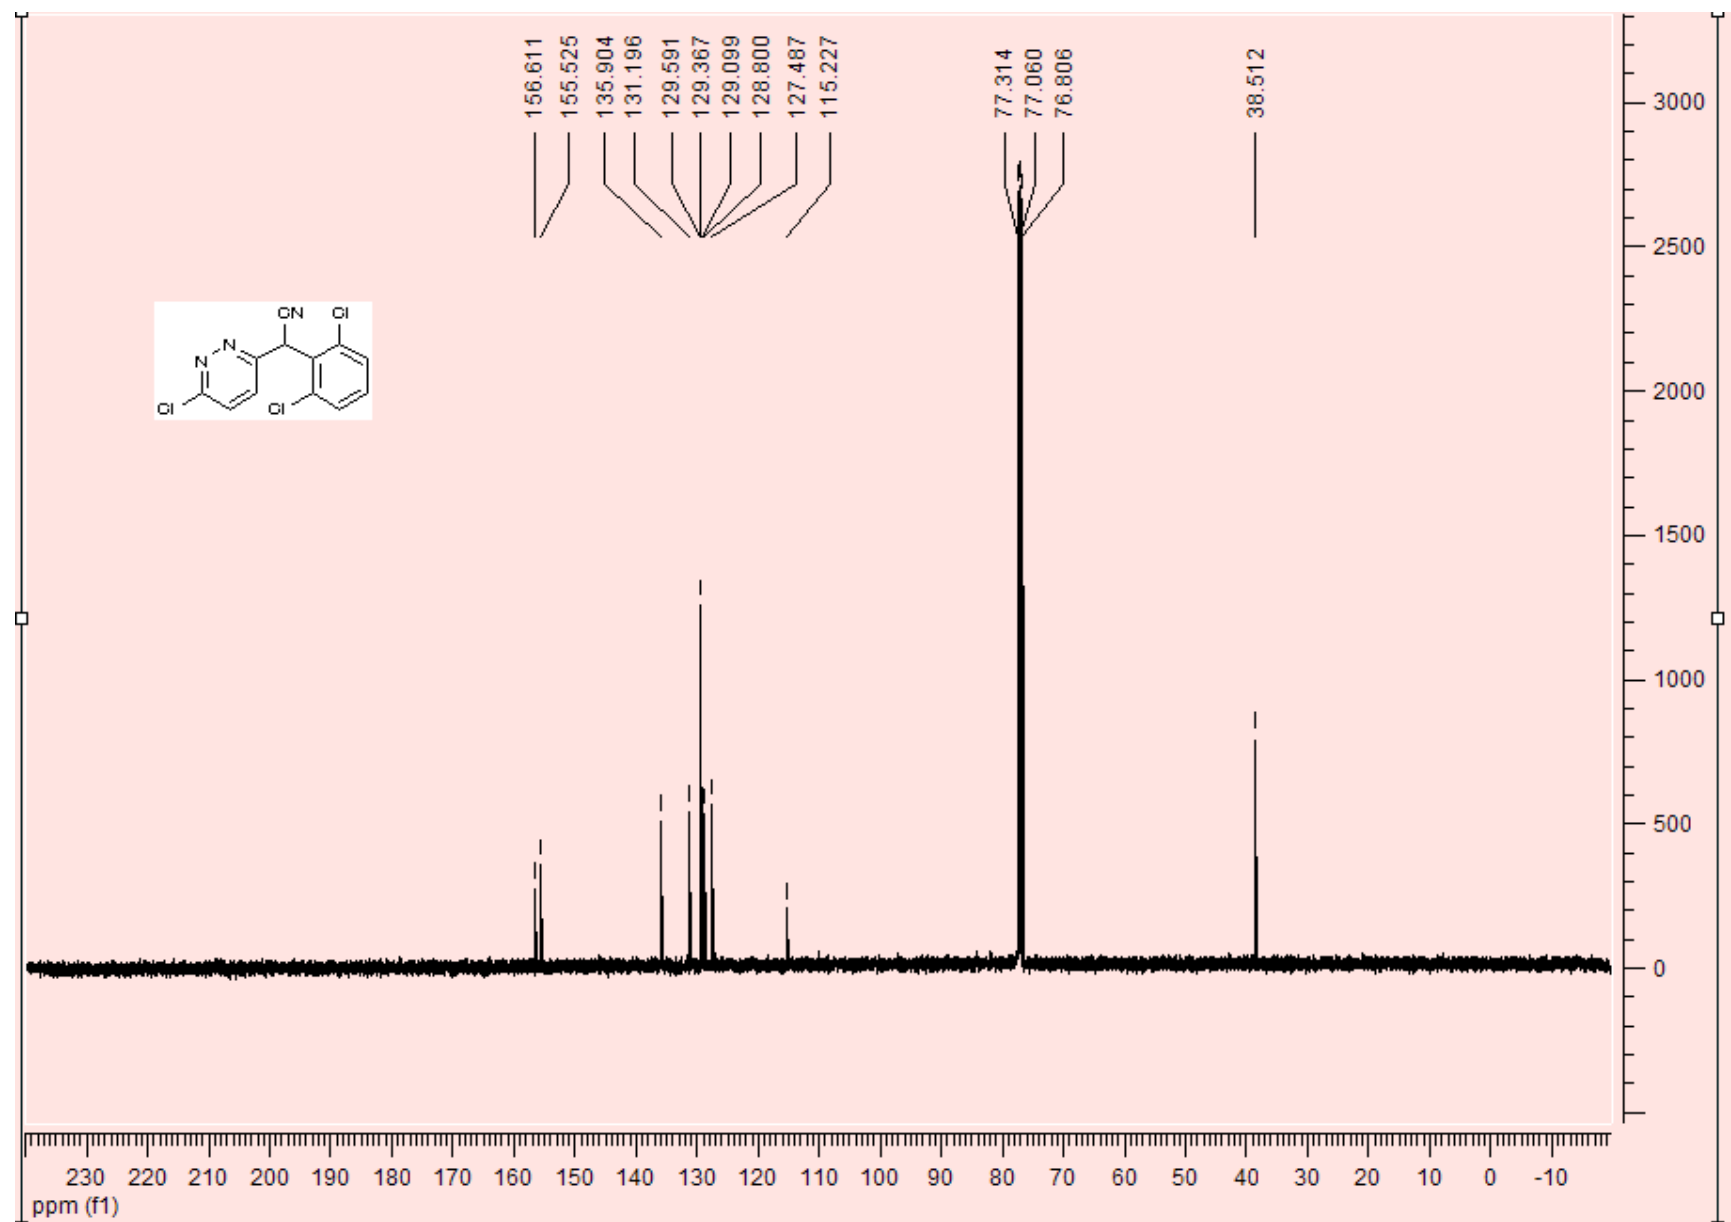



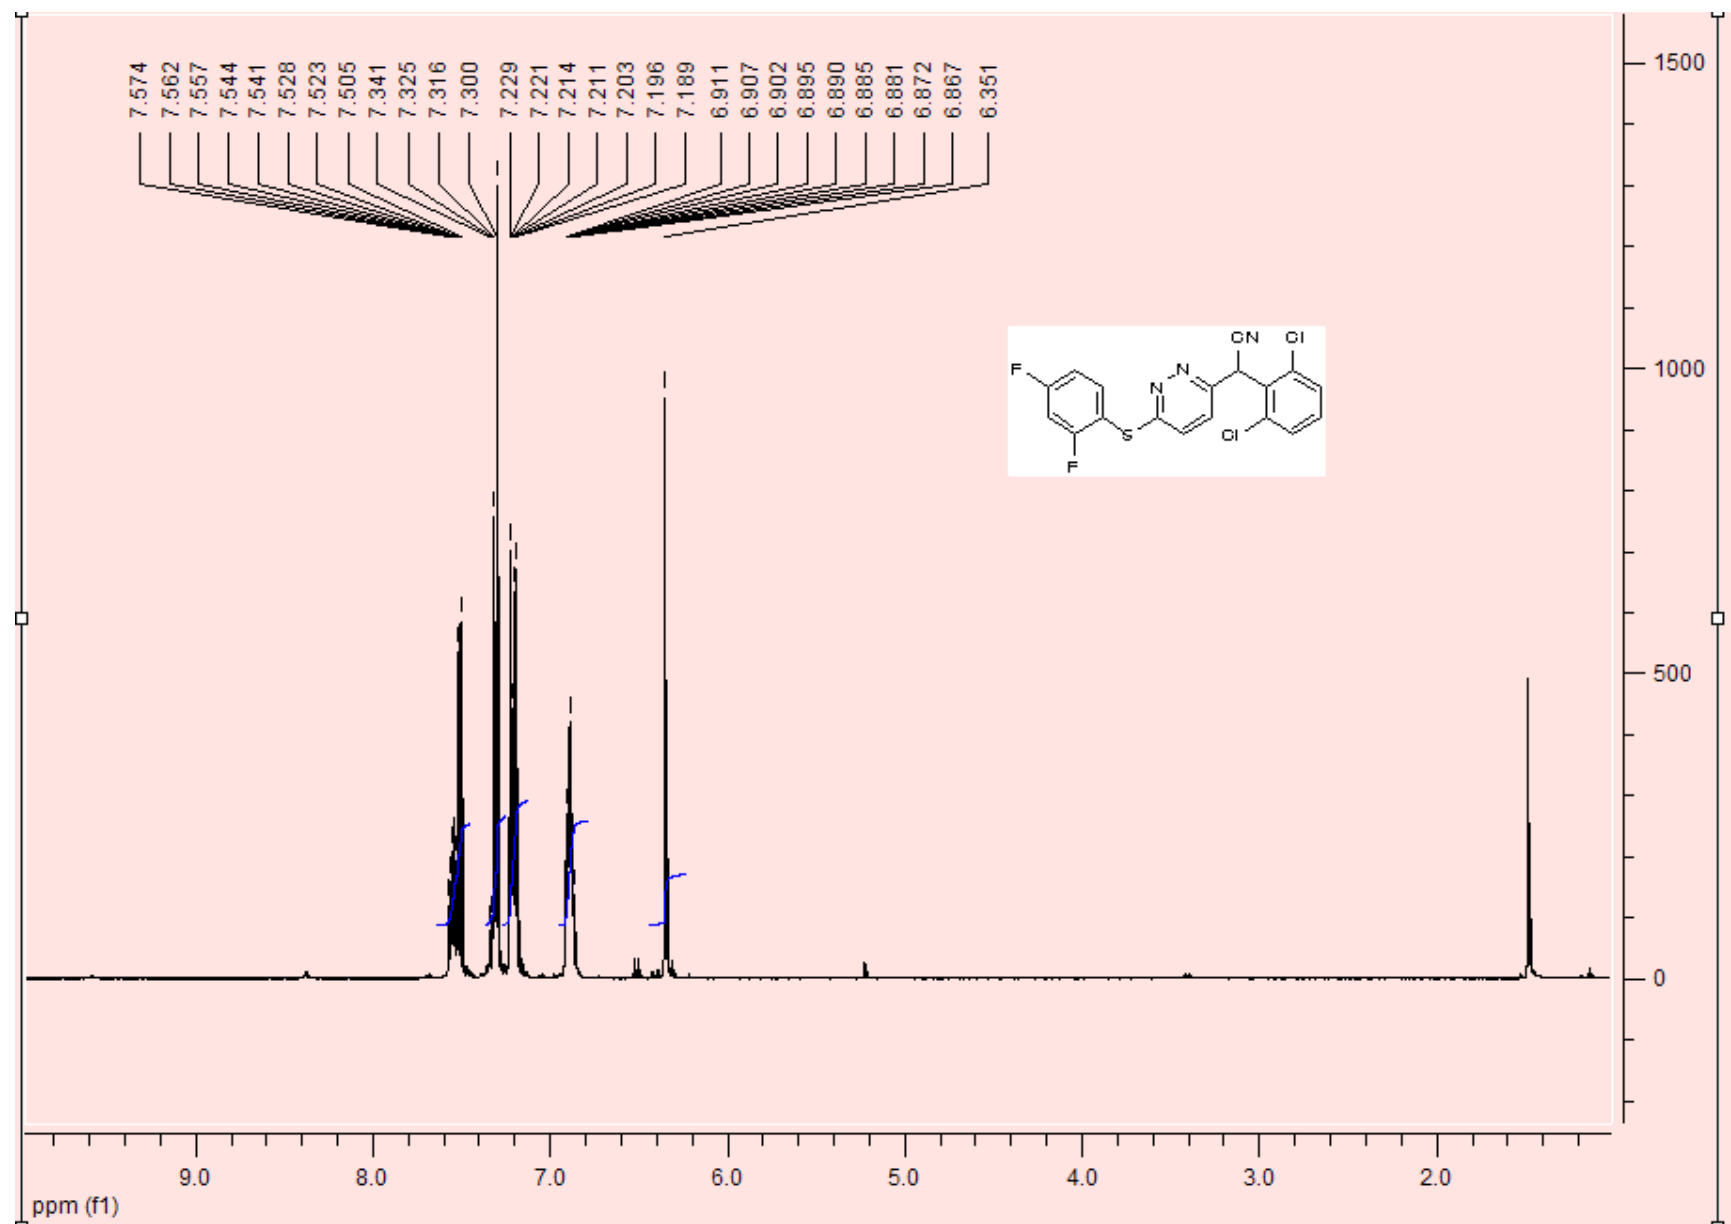

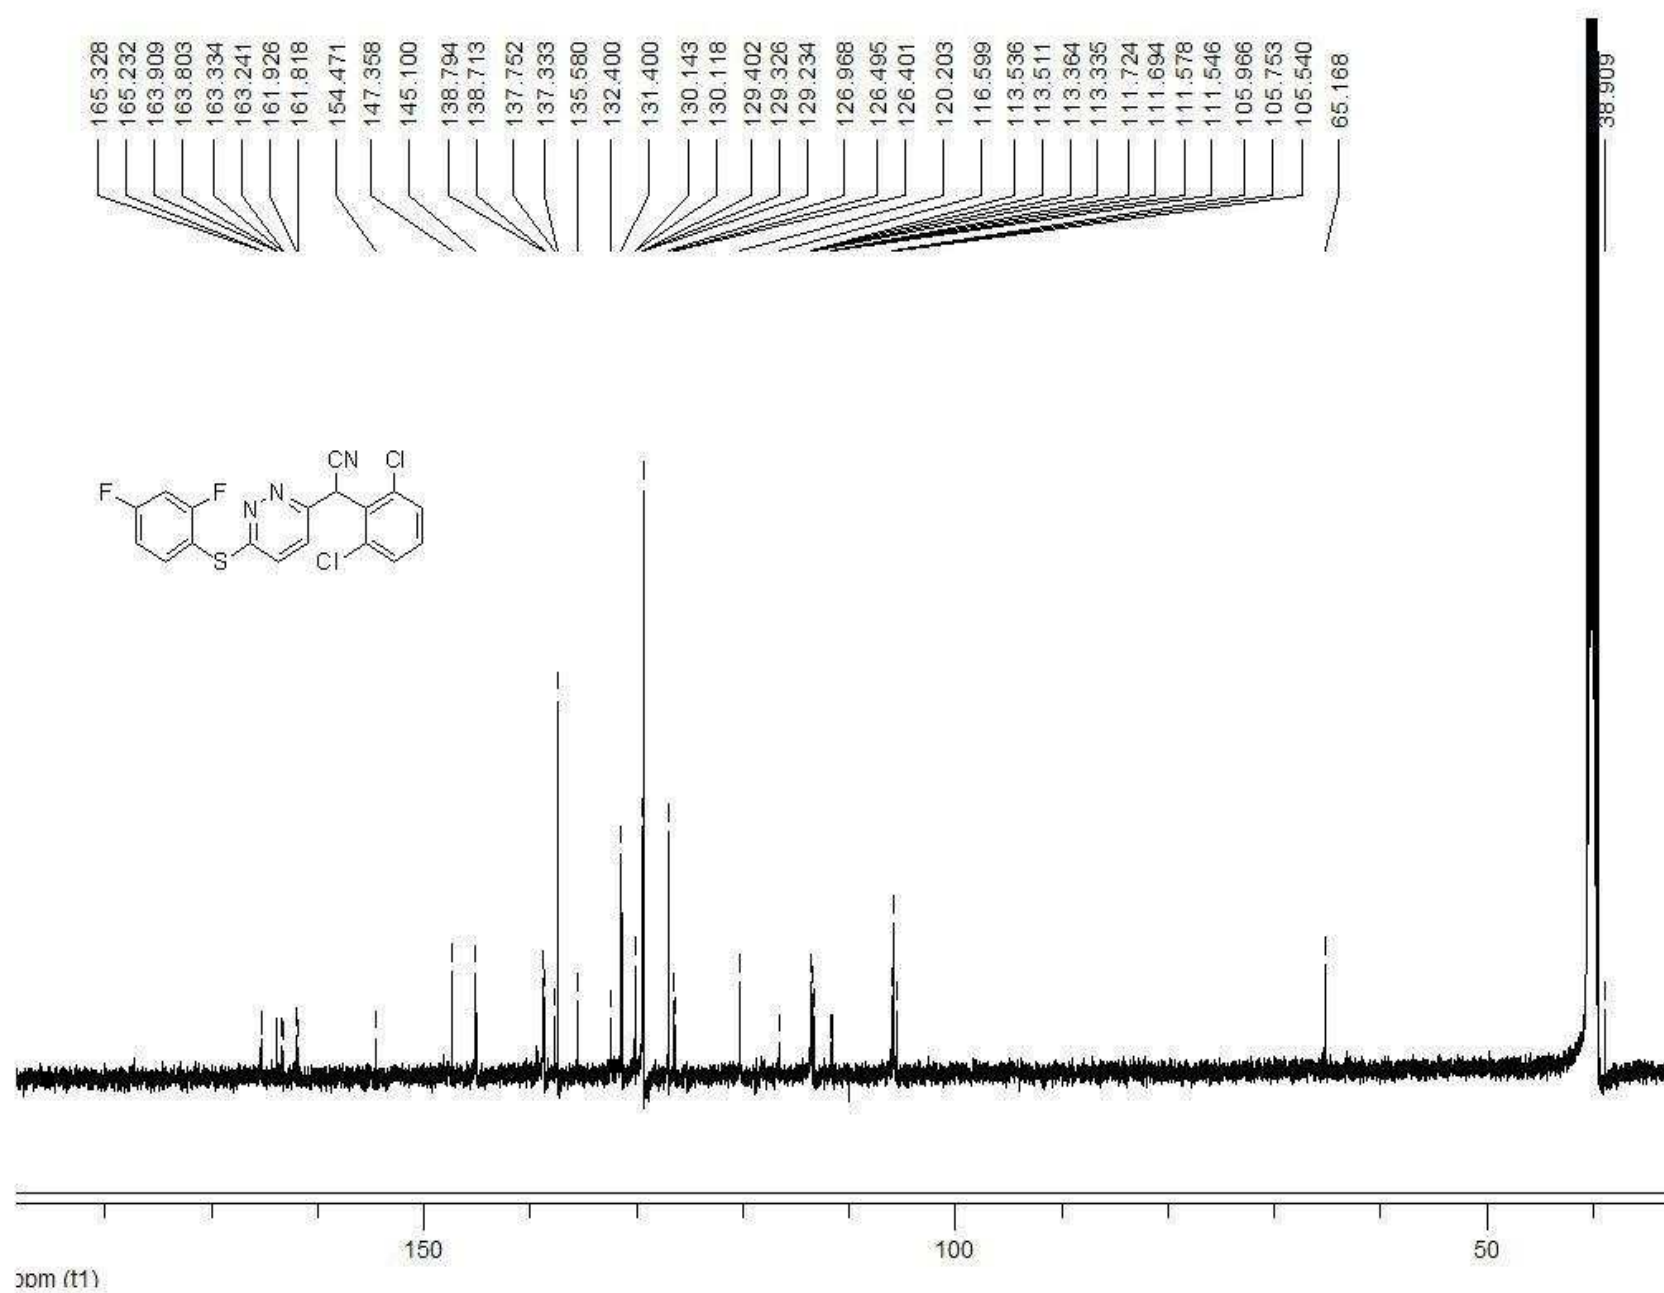

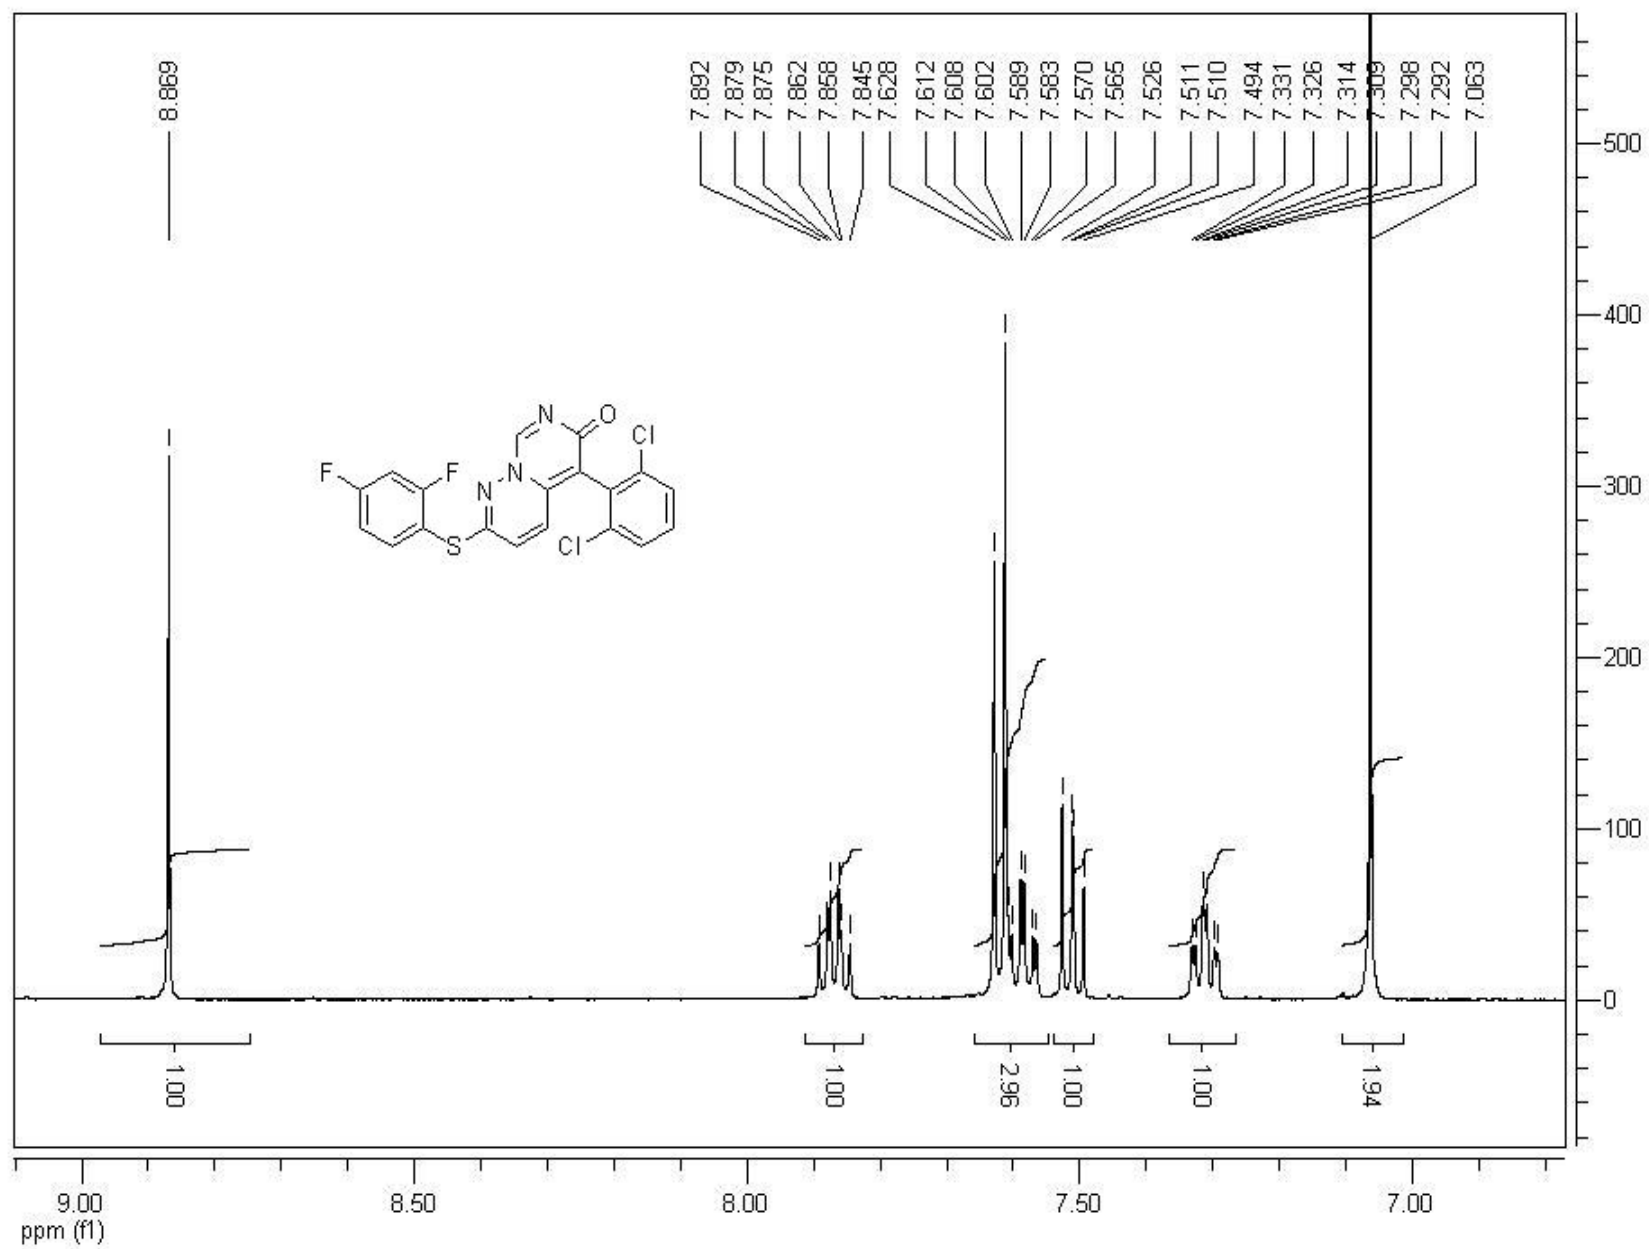

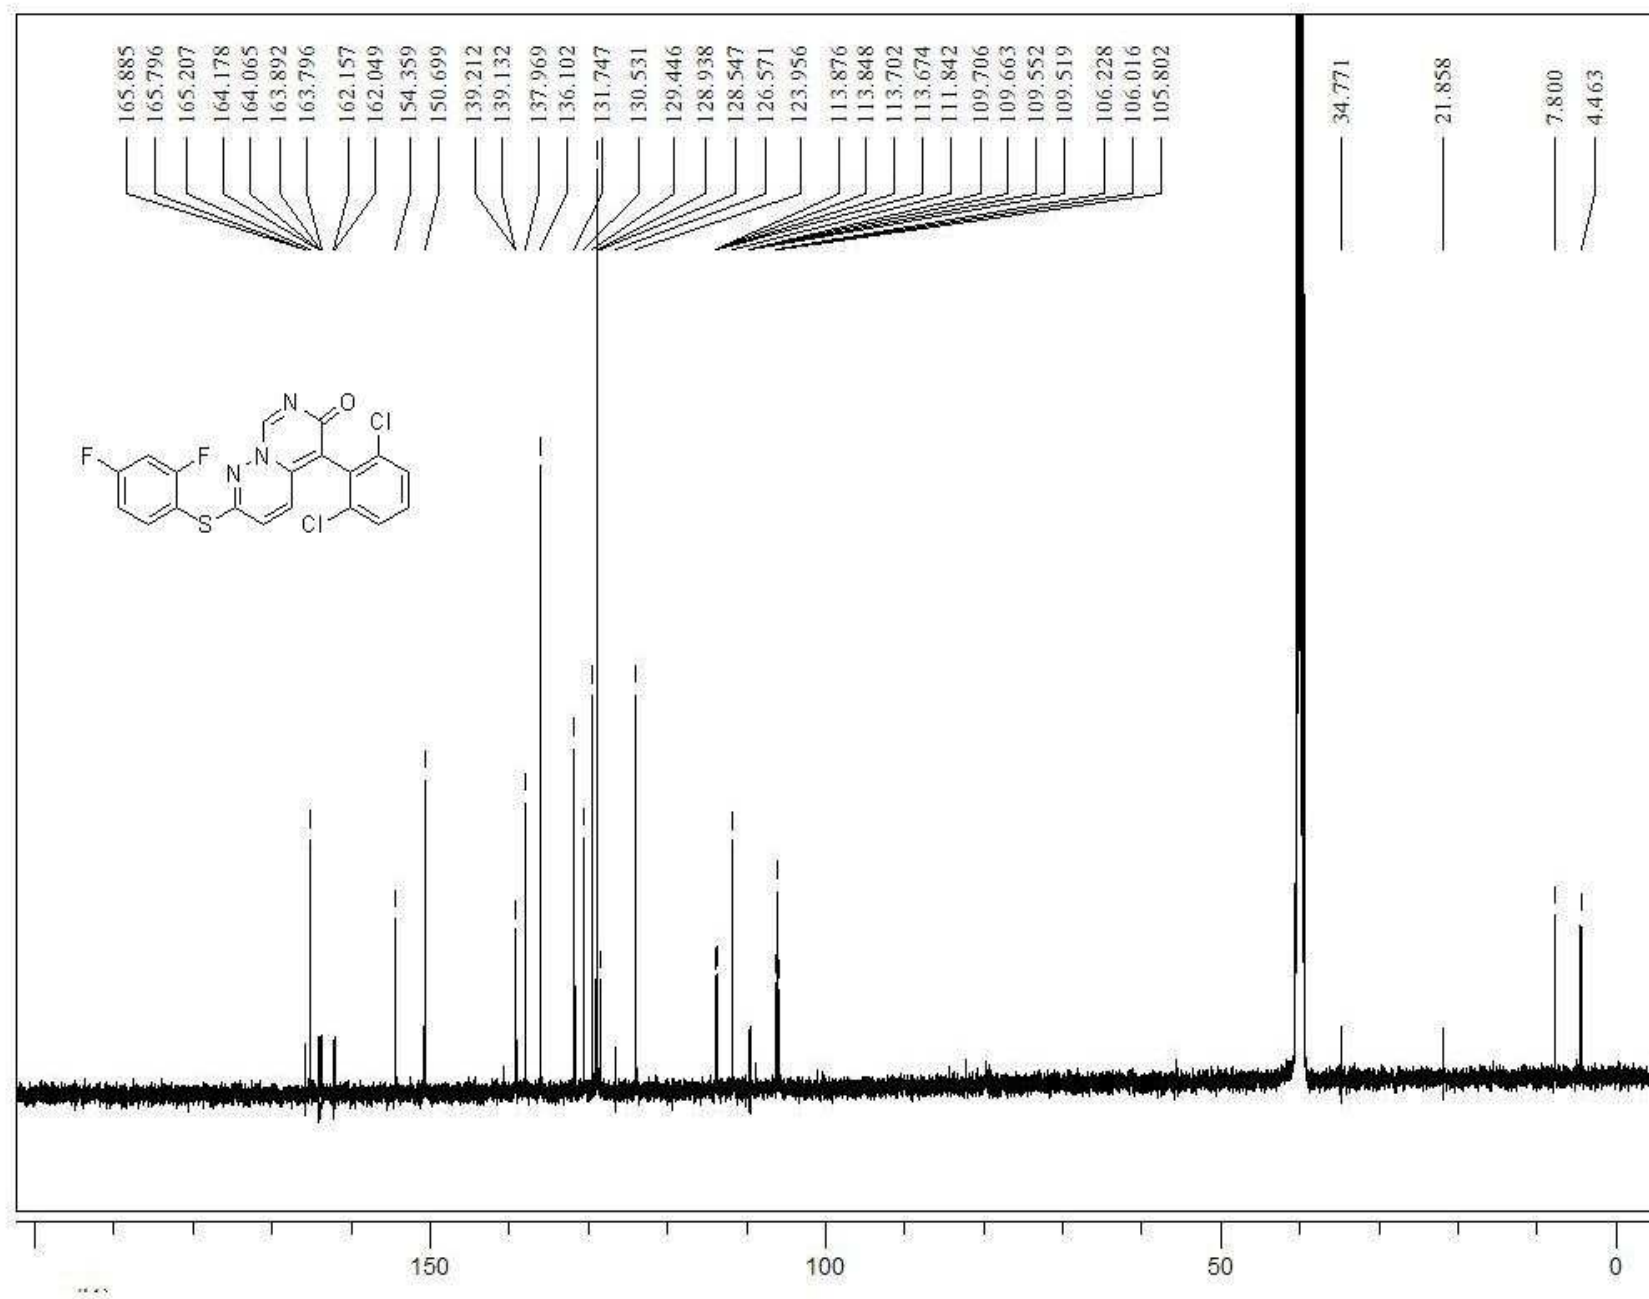

Additional references (other reference numbers refer to references and notes from the main article):

- (1) Kornblum, N.; Cheng, L.; Kerber, R. C.; Kestner, M. M.; Newton, B. N.; Pinnick, H. W.; Smith, R. G.; Wade, P.A. *J. Org. Chem.* **1976**, *41*, 1560.
- (2) Firouzabadi, H.; Mottghinejad, E.; Seddighi, M. *Synthesis* **1989**, 378.
- (3) de Geest, D. J.; O'Keefe, B. J.; Steel, P. J. *J. Organomet. Chem.* **1999**, 579, 97.
